# Supplementary material
Source: PubMed Central journal article supplement (PMC6221946)
Supplement: NIHMS1509205-supplement-1.pdf [file NIHMS1509205-supplement-1.pdf]

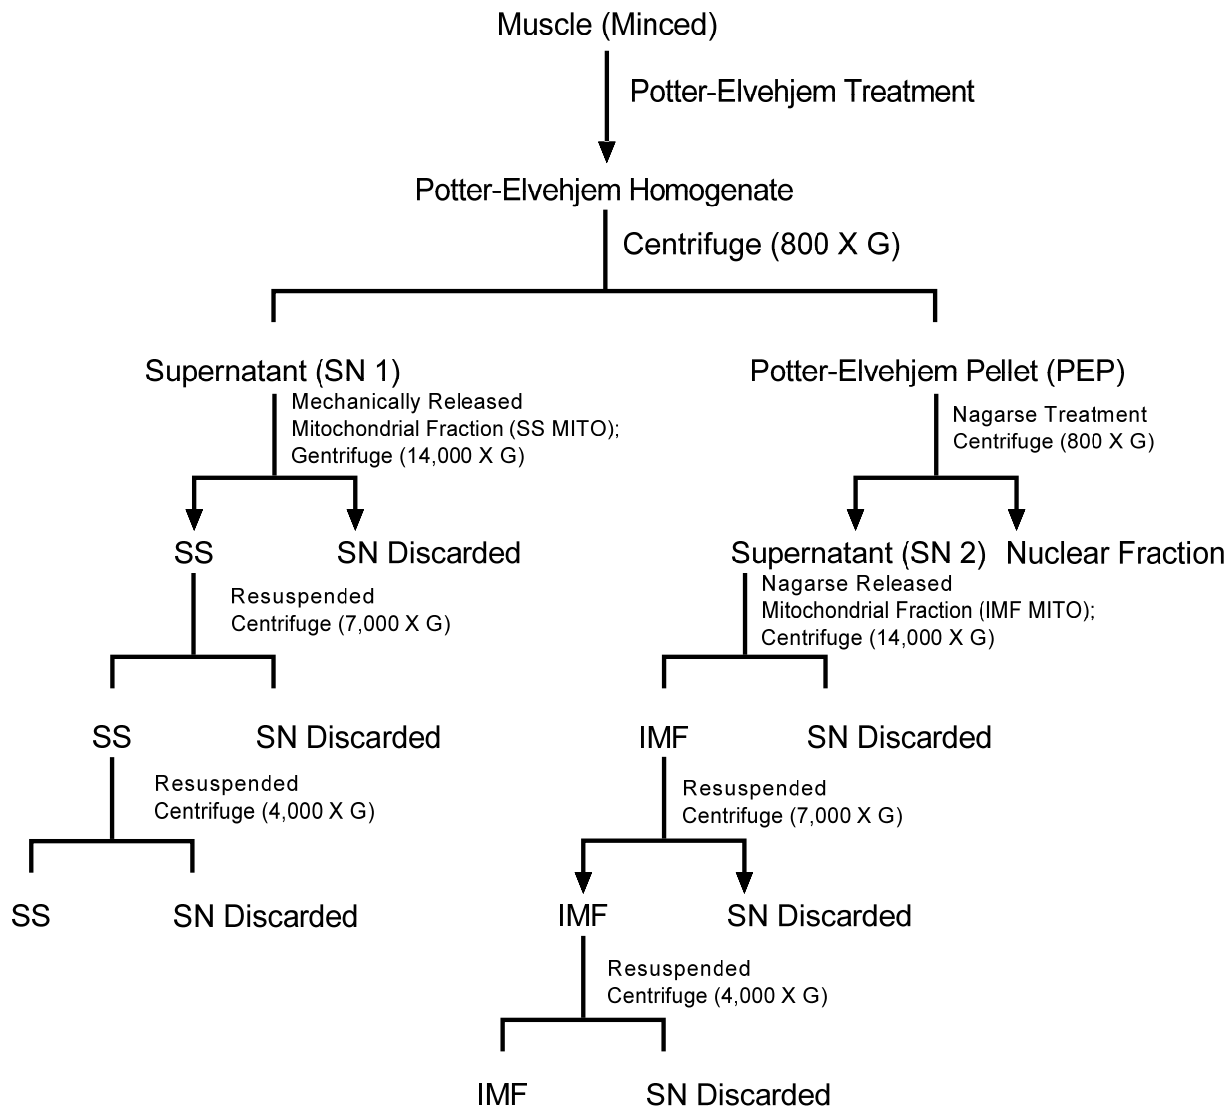

**Supplemental Figure 1** – Schematic workflow showing the isolation of skeletal muscle subsarcolemmal (SS) and intermyofibrillar (IMF) mitochondria (SN, supernatant).

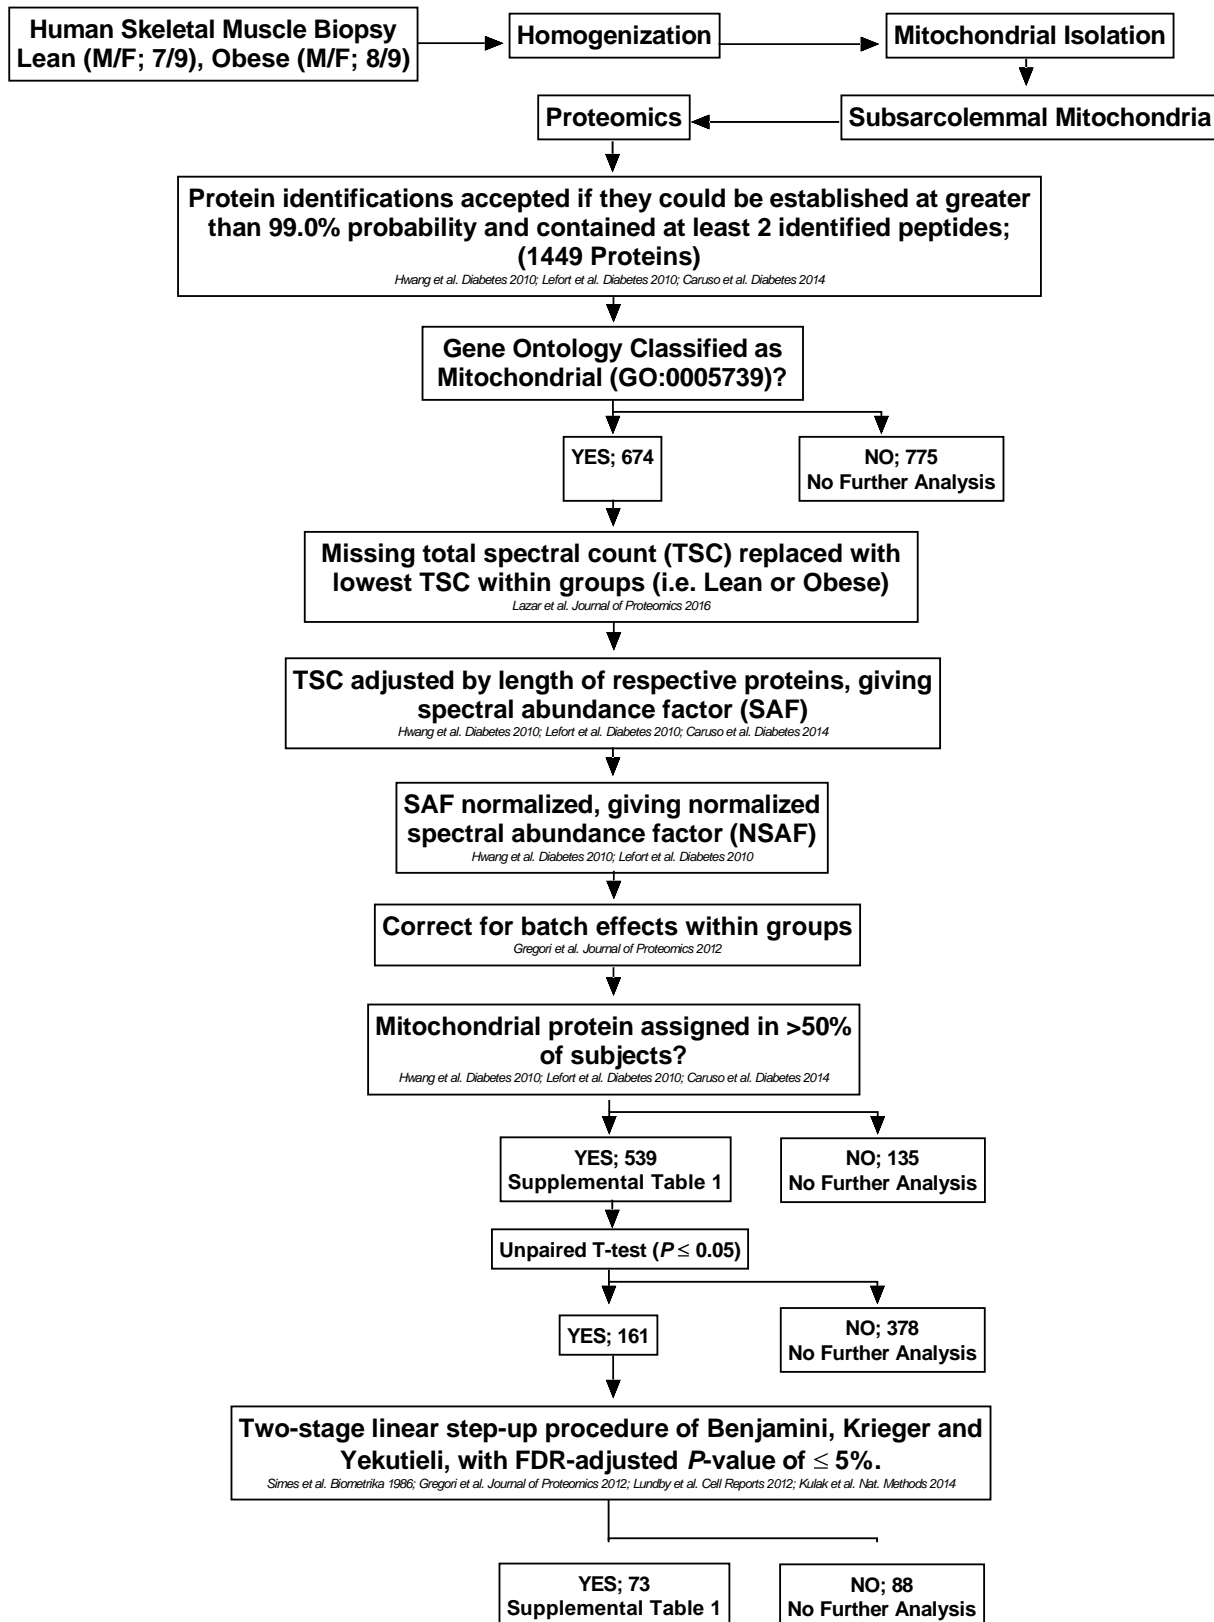

**Supplemental Figure 2** – Workflow depicting the quantification of differentially expressed mitochondrial proteins in the subsarcolemmal mitochondrial fraction (*please refer to the References list of the main document for references indicated in the steps of this workflow*).

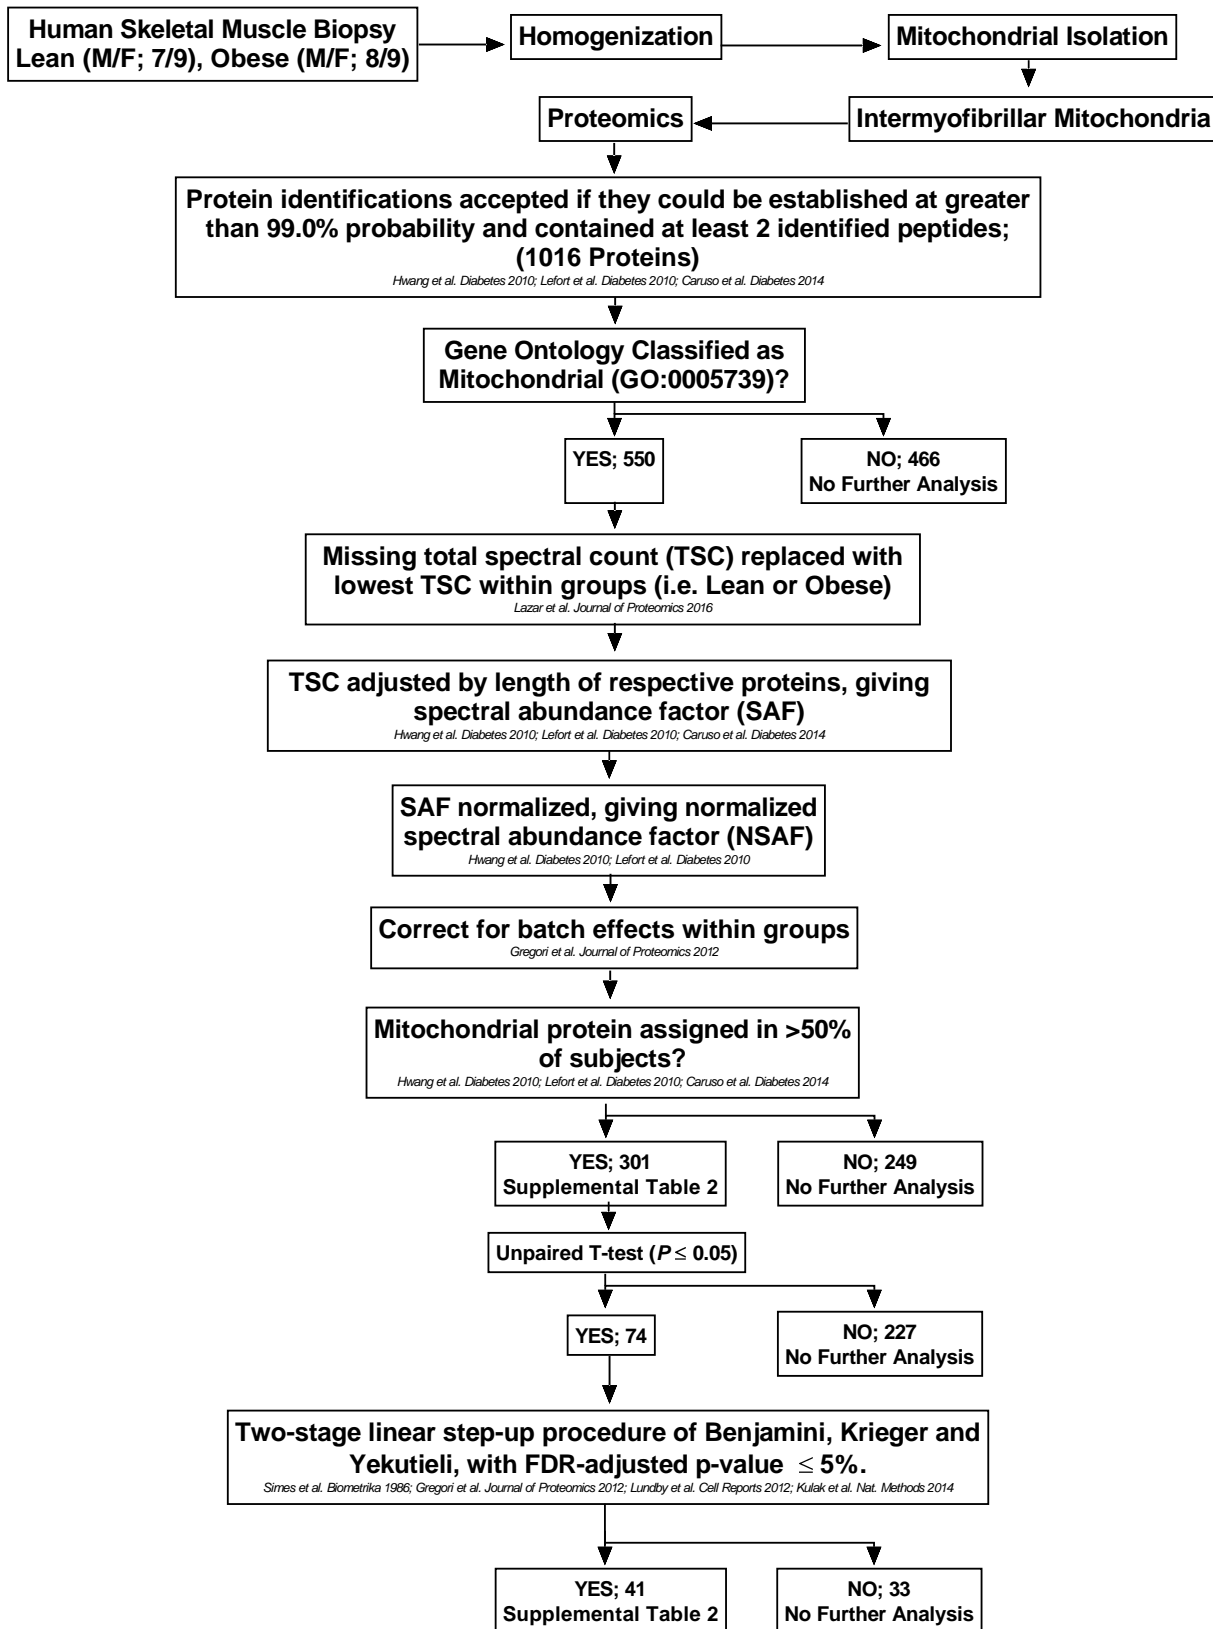

**Supplemental Figure 3** – Workflow depicting the quantification of differentially expressed mitochondrial proteins in the intermyofibrillar mitochondrial fraction (*please refer to the References list of the main document for references indicated in the steps of this workflow*).

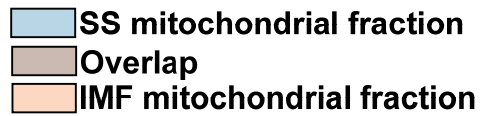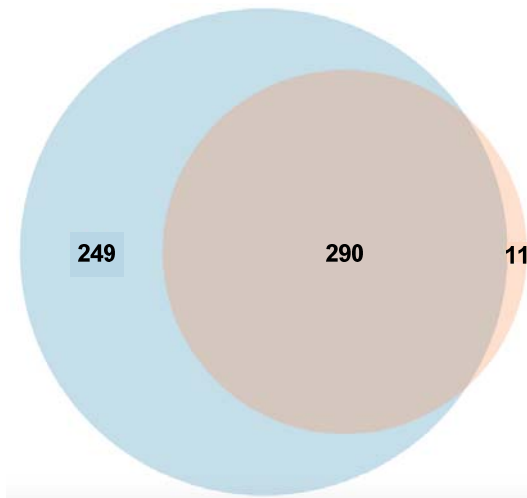

**Supplemental Figure 4** – Mitochondrial proteins identified in mitochondrial subsarcolemmal (SS) and intermyofibrillar (IMF) fractions isolated from skeletal muscle in subjects with obesity and lean controls. Area-proportional Venn diagram showing mitochondrial proteins identified in isolated muscle subsarcolemmal (SS) and intermyofibrillar (IMF) mitochondrial fractions in > 17 subjects (i.e., > 50% of the subjects). A total of 539 identified proteins were assigned to mitochondria by gene ontology (GO:0005739) in the SS mitochondrial fraction, while a total of 301 identified proteins were assigned to mitochondria in the IMF mitochondrial fraction, with 290 identified proteins overlapping between the SS and IMF mitochondrial fractions.

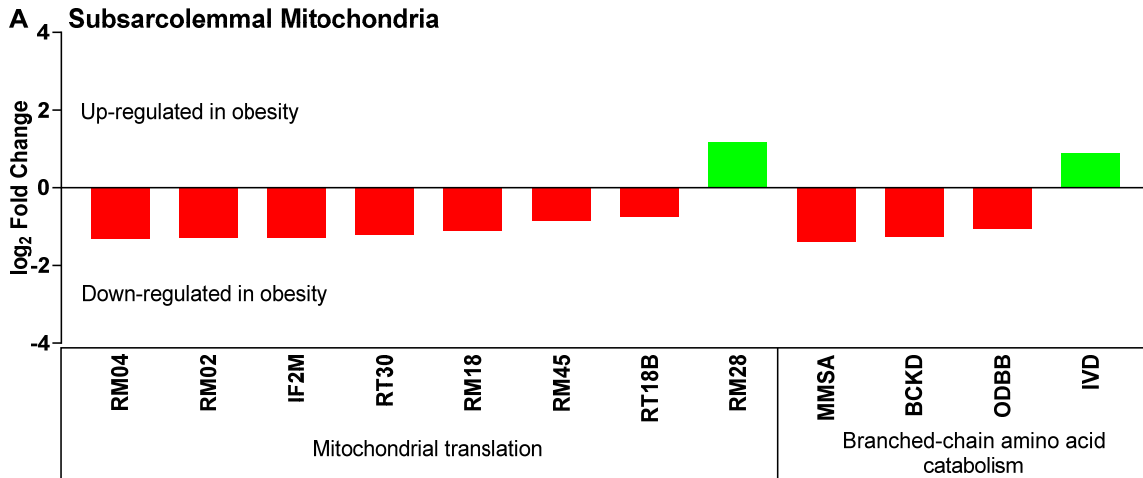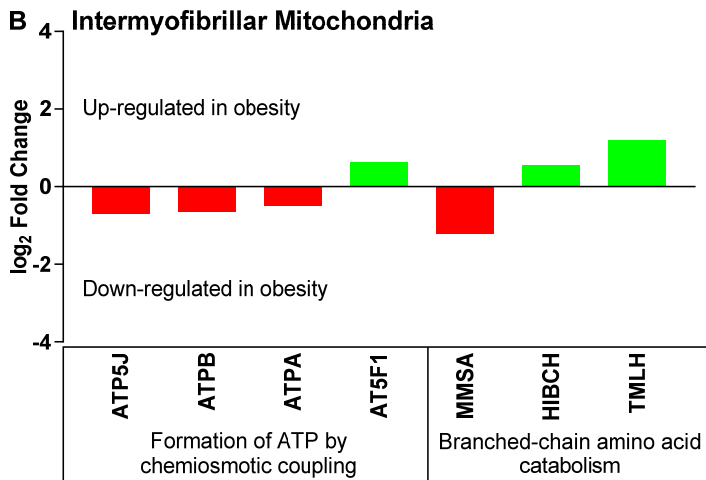

**Supplemental Figure 5** – Differentially expressed proteins in subjects with obesity relative to lean controls assigned to metabolic pathways that were enriched differentially in the subsarcolemmal (A) and intermyofibrillar (B) mitochondria between groups based on the Reactome pathway database analyses. Data are presented as log<sub>2</sub>-fold difference between lean subjects and subjects with obesity. Bars represent statistically significant (FDR adjusted p-value ≤ 0.05) up- and down-regulated protein expression in subjects with obesity.

A

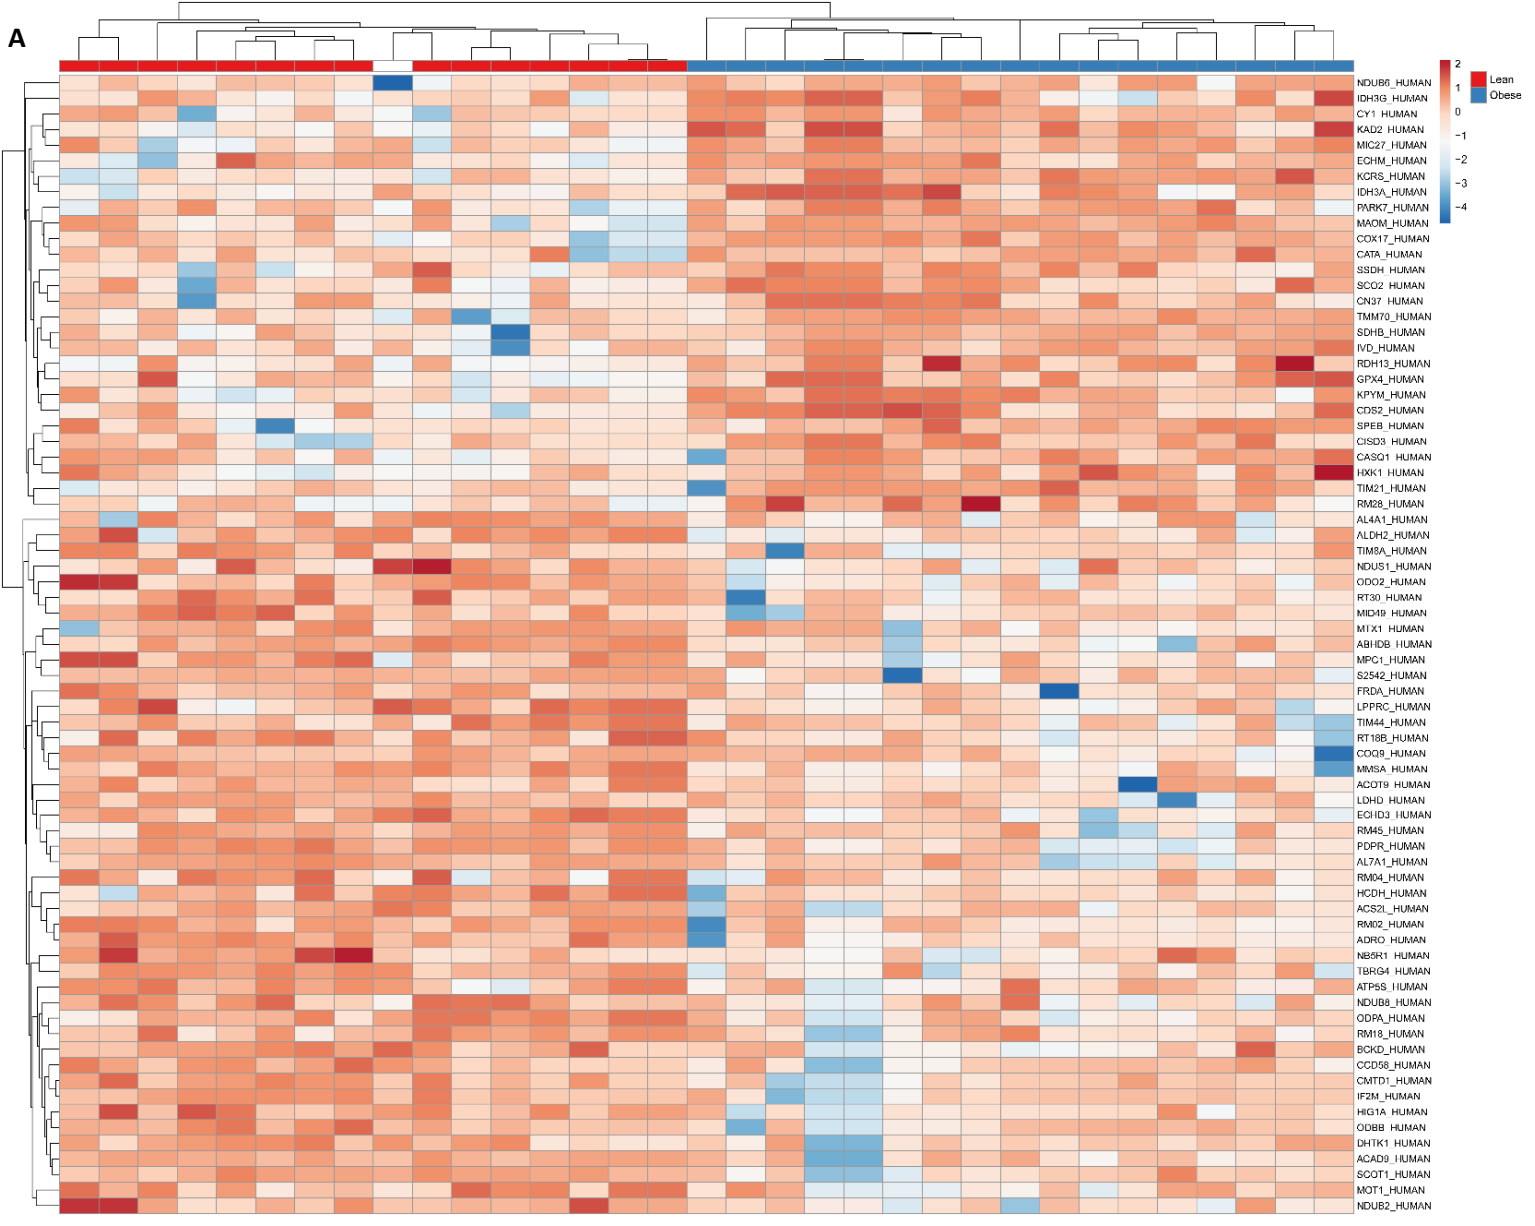

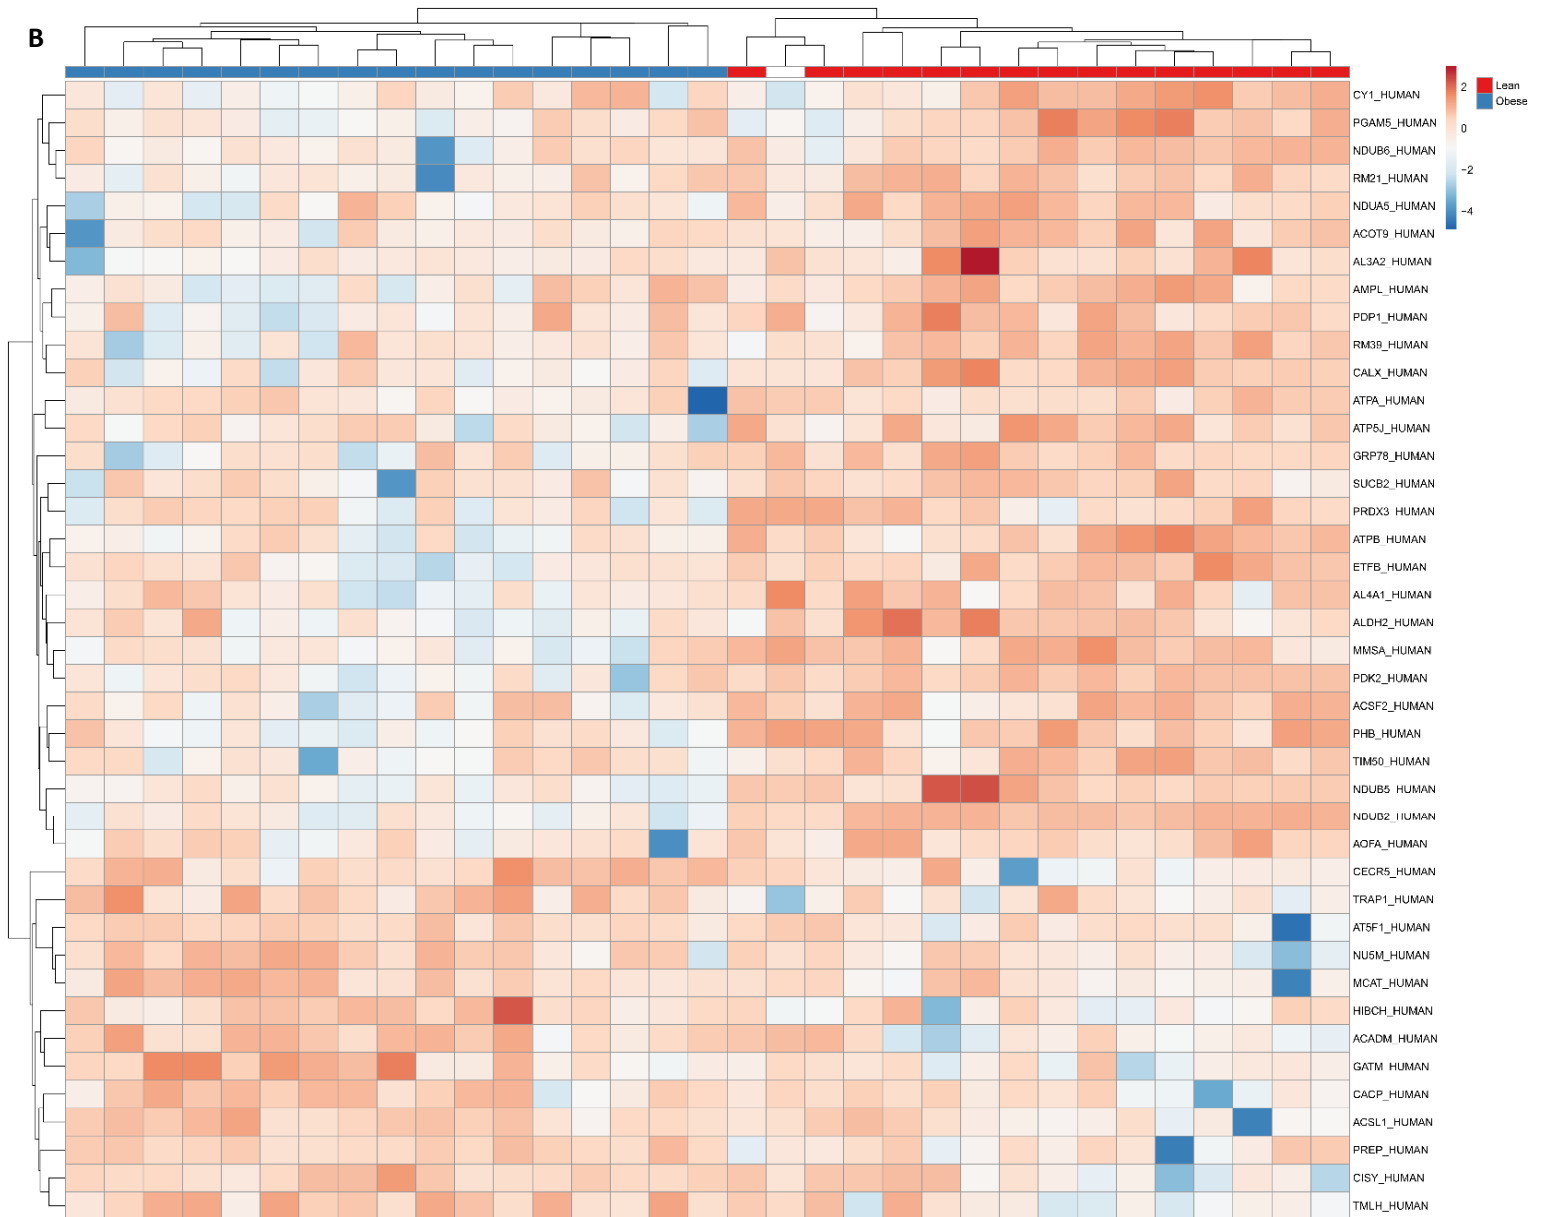

**Supplemental Figure 6** - Heatmaps for differentially expressed muscle subsarcolemmal (A) and intermyofibrillar (B) mitochondrial proteins in subjects with obesity and lean controls. Rows have been centered and unit variance scaling has been applied to rows. Columns represent each subject in the study. Both rows and columns are clustered using correlation distance and average linkage. N = 33 data points (columns 1 – 17, subjects with obesity; columns 18 – 33, lean controls).

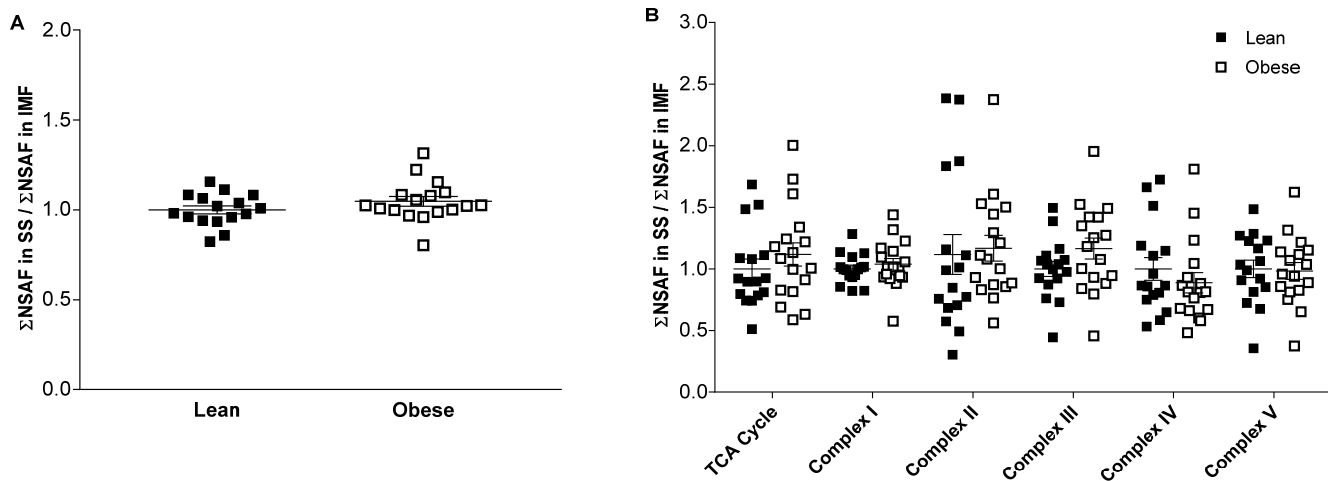

**Supplemental Figure 7** – Protein abundance in subsarcolemmal (SS) mitochondria relative to that in the intermyofibrillar (IMF) mitochondria in skeletal muscle from subjects with obesity and lean controls. Ratio describing the abundance of a total of 290 mitochondrial proteins detected in the SS mitochondrial fraction relative to the abundance of the same proteins detected in the IMF mitochondrial fraction (A). Ratio describing the abundance of manually curated groups of proteins assigned to the TCA cycle and mitochondrial protein complexes I-V (B). Protein abundance reflects the sum of normalized spectral abundance factors ( $\Sigma \text{NSAF}$ ) of the respective groups of mitochondrial proteins in each isolated mitochondrial fraction. Values are mean  $\pm$  SEM. All data have been adjusted to the lean group data for each variable.



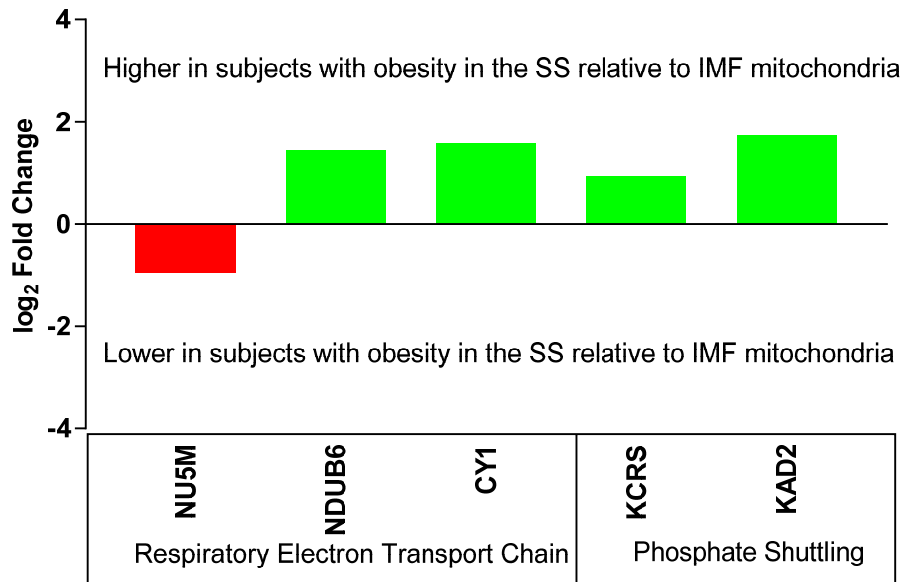

**Supplemental Figure 8** – Differentially expressed protein abundance in subsarcolemmal (SS) mitochondria relative to that in the intermyofibrillar (IMF) mitochondria and assigned to metabolic pathways that were enriched differentially between subjects with obesity and lean controls based on the Reactome pathway database analyses. Data are presented as log<sub>2</sub>-fold difference in the SS-to-IMF mitochondrial protein abundance ratio between lean subjects and subjects with obesity. Bars represent statistically significant (FDR adjusted p-value ≤ 0.05) up- and down-regulated SS-to-IMF mitochondrial protein abundance ratios in subjects with obesity.

**Supplemental Table 1**

Spectral counts and batch-corrected NSAF values for 539 proteins identified in subsarcolemmal mitochondria in >50% individuals with at least 2 unique peptides. Available at <https://dataverse.harvard.edu/api/access/datafile/3174318>

**Supplemental Table 2**

Spectral counts and batch-corrected NSAF values for 301 proteins identified in intermyofibrillar mitochondria in >50% individuals with at least 2 unique peptides. Available at <https://dataverse.harvard.edu/api/access/datafile/3174319>

**Supplemental Table 3**

**73 differentially expressed mitochondrial proteins between lean and obese subjects identified in subsarcolemmal mitochondria**

| Uniprot ID | Protein Name                                                                                                                                                                                                                                                                              | Gene Symbol(s)                           | Ratio Obese/Lean | log <sub>2</sub> O/L Ratio | p Value | FDR-corrected p Value/q Value |
|------------|-------------------------------------------------------------------------------------------------------------------------------------------------------------------------------------------------------------------------------------------------------------------------------------------|------------------------------------------|------------------|----------------------------|---------|-------------------------------|
| Q8NFV4     | Protein ABHD11 (EC 3.-.-.-) (Alpha/beta hydrolase domain-containing protein 11) (Abhydrolase domain-containing protein 11) (Williams-Beuren syndrome chromosomal region 21 protein)                                                                                                       | ABHD11, WBSR21, PP1226                   | 0.28             | -1.84                      | 0.0000  | 0.0002                        |
| Q8NCN5     | Pyruvate dehydrogenase phosphatase regulatory subunit, mitochondrial (PDP)                                                                                                                                                                                                                | PDP, KIAA1990                            | 0.29             | -1.78                      | 0.0000  | 0.0001                        |
| P22570     | NADPH:adrenodoxin oxidoreductase, mitochondrial (AR) (Adrenodoxin reductase) (EC 1.18.1.6) (Ferredoxin-NADP(+) reductase) (Ferredoxin reductase)                                                                                                                                          | FDXR, ADXR                               | 0.33             | -1.62                      | 0.0000  | 0.0001                        |
| P05091     | Aldehyde dehydrogenase, mitochondrial (EC 1.2.1.3) (ALDH class 2) (ALDH-E2) (ALDH)                                                                                                                                                                                                        | ALDH2, ALDM                              | 0.35             | -1.53                      | 0.0000  | 0.0017                        |
| O95178     | NADH dehydrogenase [ubiquinone] 1 beta subcomplex subunit 2, mitochondrial (Complex I-AGGG) (CI-AGGG) (NADH-ubiquinone oxidoreductase AGGG subunit)                                                                                                                                       | NDUFB2                                   | 0.35             | -1.52                      | 0.0018  | 0.0195                        |
| Q86VU5     | Catechol O-methyltransferase domain-containing protein 1 (EC 2.1.1.-)                                                                                                                                                                                                                     | COMT1, UNQ766/PRO1558                    | 0.38             | -1.41                      | 0.0004  | 0.0065                        |
| Q02252     | Methylmalonate-semialdehyde dehydrogenase [acylating], mitochondrial (MMSDH) (Malonate-semialdehyde dehydrogenase [acylating]) (EC 1.2.1.18) (EC 1.2.1.27) (Aldehyde dehydrogenase family 6 member A1)                                                                                    | ALDH6A1, MMSDH                           | 0.39             | -1.38                      | 0.0000  | 0.0001                        |
| P55809     | Succinyl-CoA:3-ketoacid coenzyme A transferase 1, mitochondrial (EC 2.8.3.5) (3-oxoacid CoA-transferase 1) (Somatic-type succinyl-CoA:3-oxoacid CoA-transferase) (SCOT-s)                                                                                                                 | OXCT1, OXCT, SCOT                        | 0.39             | -1.34                      | 0.0003  | 0.0055                        |
| Q9H845     | Acyl-CoA dehydrogenase family member 9, mitochondrial (ACAD-9) (EC 1.3.99.-)                                                                                                                                                                                                              | ACAD9                                    | 0.40             | -1.34                      | 0.0001  | 0.0017                        |
| Q9BYD3     | 39S ribosomal protein L4, mitochondrial (L4mt) (MRP-L4) (Mitochondrial large ribosomal subunit protein uL4m)                                                                                                                                                                              | MRPL4, CDABP0091, CGI-28                 | 0.40             | -1.31                      | 0.0047  | 0.0421                        |
| Q5T653     | 39S ribosomal protein L2, mitochondrial (L2mt) (MRP-L2) (Mitochondrial large ribosomal subunit protein uL2m)                                                                                                                                                                              | MRPL2, CGI-22                            | 0.41             | -1.27                      | 0.0000  | 0.0002                        |
| P46199     | Translation initiation factor IF-2, mitochondrial (IF-2(Mt)) (IF-2Mt) (IF2(mt))                                                                                                                                                                                                           | MTIF2                                    | 0.42             | -1.27                      | 0.0005  | 0.0081                        |
| O14874     | [3-methyl-2-oxobutanoate dehydrogenase [lipoamide]] kinase, mitochondrial (EC 2.7.11.4) (Branched-chain alpha-ketoacid dehydrogenase kinase) (BCKD-kinase) (BCKDKIN)                                                                                                                      | BCKDK                                    | 0.42             | -1.26                      | 0.0082  | 0.0547                        |
| Q96920     | Protein TBRG4 (Cell cycle progression restoration protein 2) (Cell cycle progression protein 2) (FAST kinase domain-containing protein 4) (Transforming growth factor beta regulator 4)                                                                                                   | TBRG4, CPR2, FASTKD4, KIAA0948           | 0.42             | -1.24                      | 0.0000  | 0.0003                        |
| Q9NUB1     | Acetyl-coenzyme A synthetase 2-like, mitochondrial (EC 6.2.1.1) (Acetate-CoA ligase 2) (Acetyl-CoA synthetase 2) (AceCS2) (Acyl-CoA synthetase short-chain family member 1)                                                                                                               | ACCS1, ACAS2L, KIAA1846                  | 0.43             | -1.23                      | 0.0005  | 0.0080                        |
| Q96C03     | Mitochondrial dynamics protein MID49 (Mitochondrial dynamics protein of 49 kDa) (Mitochondrial elongation factor 2) (Smith-Magenis syndrome chromosomal region candidate gene 7 protein)                                                                                                  | MIEF2, MID49, SMC7                       | 0.43             | -1.23                      | 0.0012  | 0.0153                        |
| Q9NP92     | 39S ribosomal protein S30, mitochondrial (MRP-S30) (S30mt) (Mitochondrial large ribosomal subunit protein mL65) (Mitochondrial large ribosomal subunit protein mS30) (Programmed cell death protein 9)                                                                                    | MRPS30, PDCD9, BM-047                    | 0.43             | -1.22                      | 0.0012  | 0.0153                        |
| P49419     | Alpha-aminoacidic semialdehyde dehydrogenase (Alpha-AASA dehydrogenase) (EC 1.2.1.31) (Aldehyde dehydrogenase family 7 member A1) (EC 1.2.1.3) (Antiquitin-1) (Betaine aldehyde dehydrogenase) (EC 1.2.1.8) (Delta1-piperidine-6-carboxylate dehydrogenase) (P6c dehydrogenase)           | ALDH7A1, ATQ1                            | 0.45             | -1.14                      | 0.0000  | 0.0014                        |
| Q9H0U6     | 39S ribosomal protein L18, mitochondrial (L18mt) (MRP-L18) (Mitochondrial large ribosomal subunit protein uL18m)                                                                                                                                                                          | MRPL18, HSPC071                          | 0.47             | -1.10                      | 0.0079  | 0.0545                        |
| P36957     | Dihydropyridyllysine-residue succinyltransferase component of 2-oxoglutarate dehydrogenase complex, mitochondrial (EC 2.3.1.61) (2-oxoglutarate dehydrogenase complex component E2) (OGDC-E2) (Dihydropyridylsuccinyltransferase component of 2-oxoglutarate dehydrogenase complex) (E2K) | DLST, DLTS                               | 0.48             | -1.06                      | 0.0000  | 0.0017                        |
| Q4VC31     | Coiled-coil domain-containing protein 58                                                                                                                                                                                                                                                  | CCDC58                                   | 0.48             | -1.06                      | 0.0040  | 0.0377                        |
| P21953     | 2-oxoisovalerate dehydrogenase subunit beta, mitochondrial (EC 1.2.4.4) (Branched-chain alpha-keto acid dehydrogenase E1 component beta chain) (BCKDE1B) (BCKDH E1-beta)                                                                                                                  | BCKDHB                                   | 0.49             | -1.04                      | 0.0012  | 0.0153                        |
| Q96DC8     | Enoyl-CoA hydratase domain-containing protein 3, mitochondrial                                                                                                                                                                                                                            | ECHDC3, PP1494, PP8332                   | 0.49             | -1.03                      | 0.0000  | 0.0001                        |
| Q9Y5U8     | Mitochondrial pyruvate carrier 1 (Brain protein 44-like protein)                                                                                                                                                                                                                          | MPC1, BRP44L, CGI-129, HSPC040, PNAS-115 | 0.49             | -1.02                      | 0.0002  | 0.0044                        |
| Q9Y241     | HIG1 domain family member 1A, mitochondrial (Hypoxia-inducible gene 1 protein) (RCF1 homolog A) (RCF1a)                                                                                                                                                                                   | HIGD1A, HIG1, HSPC010                    | 0.51             | -0.98                      | 0.0001  | 0.0019                        |
| Q86VD7     | Mitochondrial coenzyme A transporter SLC25A42 (Solute carrier family 25 member 42)                                                                                                                                                                                                        | SLC25A42                                 | 0.52             | -0.96                      | 0.0002  | 0.0044                        |
| Q96HY7     | Probable 2-oxoglutarate dehydrogenase E1 component DHKTD1, mitochondrial (EC 1.2.4.2) (Dehydrogenase E1 and transketolase domain-containing protein 1)                                                                                                                                    | DHTKD1, KIAA1630                         | 0.52             | -0.93                      | 0.0082  | 0.0547                        |
| P53985     | Monocarboxylate transporter 1 (MCT 1) (Solute carrier family 16 member 1)                                                                                                                                                                                                                 | SLC16A1, MCT1                            | 0.53             | -0.92                      | 0.0024  | 0.0248                        |
| O43615     | Mitochondrial import inner membrane translocase subunit TIM44                                                                                                                                                                                                                             | TIMM44, MIMT44, TIM44                    | 0.53             | -0.92                      | 0.0019  | 0.0201                        |
| P08559     | Pyruvate dehydrogenase E1 component subunit alpha, somatic form, mitochondrial (EC 1.2.4.1) (PDHE1-A type I)                                                                                                                                                                              | PDHA1, PHE1A                             | 0.53             | -0.91                      | 0.0002  | 0.0044                        |
| Q99766     | ATP synthase subunit s, mitochondrial (ATP synthase-coupling factor B) (FB) (Mitochondrial ATP synthase regulatory component factor B)                                                                                                                                                    | ATP5S, ATPW                              | 0.54             | -0.89                      | 0.0051  | 0.0426                        |
| Q86WU2     | Probable D-lactate dehydrogenase, mitochondrial (DLD) (Lactate dehydrogenase D) (EC 1.1.2.4)                                                                                                                                                                                              | LDHD                                     | 0.54             | -0.89                      | 0.0032  | 0.0316                        |
| Q13505     | Metaxin-1 (Mitochondrial outer membrane import complex protein 1)                                                                                                                                                                                                                         | MTX1, MTX, MTXN                          | 0.54             | -0.89                      | 0.0037  | 0.0354                        |
| Q16595     | Frataxin, mitochondrial (EC 1.16.3.1) (Friedreich ataxia protein) (Fxn) [Cleaved into: Frataxin intermediate form (i-Fxn); Frataxin(56-210) (m56-Fxn); Frataxin(78-210) (d-Fxn) (m78-Fxn); Frataxin mature form (Frataxin(81-210)) (m81-Fxn)]                                             | FXN, FRDA, X25                           | 0.54             | -0.89                      | 0.0007  | 0.0103                        |
| Q9BRJ2     | 39S ribosomal protein L45, mitochondrial (L45mt) (MRP-L45) (Mitochondrial large ribosomal subunit protein mL45)                                                                                                                                                                           | MRPL45                                   | 0.56             | -0.84                      | 0.0024  | 0.0248                        |

|        |                                                                                                                                                                                                                                                  |                                                  |      |       |        |        |
|--------|--------------------------------------------------------------------------------------------------------------------------------------------------------------------------------------------------------------------------------------------------|--------------------------------------------------|------|-------|--------|--------|
| P30038 | Delta-1-pyrroline-5-carboxylate dehydrogenase, mitochondrial (P5C dehydrogenase) (EC 1.2.1.88) (Aldehyde dehydrogenase family 4 member A1) (L-glutamate gamma-semialdehyde dehydrogenase)                                                        | ALDH4A1, ALDH4, P5CDH                            | 0.56 | -0.83 | 0.0048 | 0.0421 |
| O60220 | Mitochondrial import inner membrane translocase subunit Tim8 A (Deafness dystonia protein 1) (X-linked deafness dystonia protein)                                                                                                                | TIMM8A, DDP, DDP1, TIM8A                         | 0.59 | -0.77 | 0.0063 | 0.0458 |
| P42704 | Leucine-rich PPR motif-containing protein, mitochondrial (130 kDa leucine-rich protein) (LRP130) (GP130)                                                                                                                                         | LRPPRC, LRP130                                   | 0.59 | -0.77 | 0.0006 | 0.0082 |
| P28331 | NADH-ubiquinone oxidoreductase 75 kDa subunit, mitochondrial (EC 1.6.5.3) (EC 1.6.99.3) (Complex I-75kD) (CI-75kD)                                                                                                                               | NDUF51                                           | 0.60 | -0.75 | 0.0061 | 0.0458 |
| Q9Y676 | 28S ribosomal protein S18b, mitochondrial (MRP-S18-b) (Mrps18-b) (S18mt-b) (28S ribosomal protein S18-2, mitochondrial) (MRP-S18-2) (Mitochondrial small ribosomal subunit protein bS18b) (Mitochondrial small ribosomal subunit protein mS40)   | MRPS18B, C6orf14, HSPC183, PT0017                | 0.60 | -0.74 | 0.0005 | 0.0080 |
| O75208 | Ubiquinone biosynthesis protein COQ9, mitochondrial                                                                                                                                                                                              | COQ9, C16orf49, HSPC326, PSEC0129                | 0.61 | -0.72 | 0.0048 | 0.0421 |
| O95169 | NADH dehydrogenase [ubiquinone] 1 beta subcomplex subunit 8, mitochondrial (Complex I-ASHI) (CI-ASHI) (NADH-ubiquinone oxidoreductase ASHI subunit)                                                                                              | NDUF88                                           | 0.61 | -0.71 | 0.0017 | 0.0195 |
| Q9Y305 | Acyl-coenzyme A thioesterase 9, mitochondrial (Acyl-CoA thioesterase 9) (EC 3.1.2.-) (Acyl-CoA thioester hydrolase 9)                                                                                                                            | ACOT9, CGI-16                                    | 0.61 | -0.71 | 0.0059 | 0.0458 |
| Q16836 | Hydroxyacyl-coenzyme A dehydrogenase, mitochondrial (HCDH) (EC 1.1.1.35) (Medium and short-chain L-3-hydroxyacyl-coenzyme A dehydrogenase) (Short-chain 3-hydroxyacyl-CoA dehydrogenase)                                                         | HADH, HAD, HADHSC, SCHAD                         | 0.65 | -0.61 | 0.0011 | 0.0142 |
| Q9UHQ9 | NADH-cytochrome b5 reductase 1 (b5R.1) (EC 1.6.2.2) (Humb5R2) (NAD(P)H:quinone oxidoreductase type 3 polypeptide A2)                                                                                                                             | CYB5R1, NQO3A2, UNQ3049/PRO9865                  | 0.68 | -0.56 | 0.0052 | 0.0430 |
| Q8NBN7 | Retinol dehydrogenase 13 (EC 1.1.1.-) (Short chain dehydrogenase/reductase family 7C member 3)                                                                                                                                                   | RDH13, SDR7C3, PSEC0082, UNQ736/PRO1430          | 1.43 | 0.52  | 0.0051 | 0.0426 |
| P51553 | Iso citrate dehydrogenase [NAD] subunit gamma, mitochondrial (Isocitric dehydrogenase subunit gamma) (NAD(+)-specific ICDH subunit gamma)                                                                                                        | IDH3G                                            | 1.52 | 0.61  | 0.0082 | 0.0547 |
| P51649 | Succinate-semialdehyde dehydrogenase, mitochondrial (EC 1.2.1.24) (Aldehyde dehydrogenase family 5 member A1) (NAD(+)-dependent succinic semialdehyde dehydrogenase)                                                                             | ALDH5A1, SSADH                                   | 1.53 | 0.61  | 0.0067 | 0.0478 |
| P17540 | Creatine kinase S-type, mitochondrial (EC 2.7.3.2) (Basic-type mitochondrial creatine kinase) (Mib-CK) (Sarcomeric mitochondrial creatine kinase) (S-MTCK)                                                                                       | CKMT2                                            | 1.56 | 0.64  | 0.0004 | 0.0063 |
| O95139 | NADH dehydrogenase [ubiquinone] 1 beta subcomplex subunit 6 (Complex I-B17) (CI-B17) (NADH-ubiquinone oxidoreductase B17 subunit)                                                                                                                | NDUF86                                           | 1.57 | 0.65  | 0.0016 | 0.0190 |
| P31415 | Calsequestrin-1 (Calmitine) (Calsequestrin, skeletal muscle isoform)                                                                                                                                                                             | CASQ1, CASQ                                      | 1.65 | 0.72  | 0.0060 | 0.0458 |
| P50213 | Iso citrate dehydrogenase [NAD] subunit alpha, mitochondrial (EC 1.1.1.41) (Isocitric dehydrogenase subunit alpha) (NAD(+)-specific ICDH subunit alpha)                                                                                          | IDH3A                                            | 1.79 | 0.84  | 0.0001 | 0.0036 |
| Q9BVV7 | Mitochondrial import inner membrane translocase subunit Tim21 (TIM21-like protein, mitochondrial)                                                                                                                                                | TIMM21, C18orf55, TIM21, HSPC154                 | 1.80 | 0.85  | 0.0018 | 0.0195 |
| P30084 | Enoyl-CoA hydratase, mitochondrial (EC 4.2.1.17) (Enoyl-CoA hydratase 1) (Short-chain enoyl-CoA hydratase) (SCEH)                                                                                                                                | ECHS1                                            | 1.80 | 0.85  | 0.0055 | 0.0445 |
| P19367 | Hexokinase-1 (EC 2.7.1.1) (Brain form hexokinase) (Hexokinase type I) (HK I)                                                                                                                                                                     | HK1                                              | 1.84 | 0.88  | 0.0030 | 0.0302 |
| P26440 | Isovaleryl-CoA dehydrogenase, mitochondrial (IVD) (EC 1.3.8.4)                                                                                                                                                                                   | IVD                                              | 1.86 | 0.89  | 0.0013 | 0.0160 |
| P04040 | Catalase (EC 1.11.1.6)                                                                                                                                                                                                                           | CAT                                              | 1.89 | 0.92  | 0.0060 | 0.0458 |
| P08574 | Cytochrome c1, heme protein, mitochondrial (Complex III subunit 4) (Complex III subunit IV) (Cytochrome b-c1 complex subunit 4) (Ubiquinol-cytochrome-c reductase complex cytochrome c1 subunit) (Cytochrome c-1)                                | CYC1                                             | 2.01 | 1.01  | 0.0003 | 0.0055 |
| P0C7P0 | CDGSH iron-sulfur domain-containing protein 3, mitochondrial (MitoNEET-related protein 2) (Miner2)                                                                                                                                               | CISD3                                            | 2.06 | 1.04  | 0.0007 | 0.0103 |
| Q6UXV4 | MICOS complex subunit MIC27 (Apolipoprotein O-like) (Protein FAM121A)                                                                                                                                                                            | APOOL, CxorF33, FAM121A, MIC27, UNQ8193/PRO23204 | 2.08 | 1.06  | 0.0001 | 0.0031 |
| Q9B5E5 | Agmatinase, mitochondrial (EC 3.5.3.11) (Agmatine ureohydrolase) (AUH)                                                                                                                                                                           | AGMAT                                            | 2.10 | 1.07  | 0.0006 | 0.0082 |
| Q99497 | Protein/nucleic acid deglycase DJ-1 (EC 3.1.2.-) (EC 3.5.1.-) (EC 3.5.1.124) (Maillard deglycase) (Oncogene DJ1) (Parkinson disease protein 7) (Parkinsonism-associated deglycase) (Protein DJ-1) (DJ-1)                                         | PARK7                                            | 2.11 | 1.08  | 0.0021 | 0.0222 |
| P23368 | NAD-dependent malic enzyme, mitochondrial (NAD-ME) (EC 1.1.1.38) (Malic enzyme 2)                                                                                                                                                                | ME2                                              | 2.11 | 1.08  | 0.0001 | 0.0025 |
| P14618 | Pyruvate kinase PKM (EC 2.7.1.40) (Cytosolic thyroid hormone-binding protein) (CTHBP) (Opa-interacting protein 3) (OIP-3) (Pyruvate kinase 2/3) (Pyruvate kinase muscle isozyme) (Thyroid hormone-binding protein 1) (THBP1) (Tumor M2-PK) (p58) | PKM, OIP3, PK2, PK3, PKM2                        | 2.16 | 1.11  | 0.0000 | 0.0012 |
| Q9BUB7 | Transmembrane protein 70, mitochondrial                                                                                                                                                                                                          | TMEM70                                           | 2.19 | 1.13  | 0.0000 | 0.0017 |
| P21912 | Succinate dehydrogenase [ubiquinone] iron-sulfur subunit, mitochondrial (EC 1.3.5.3) (Iron-sulfur subunit of complex II) (Ips)                                                                                                                   | SDHB, SDH, SDH1                                  | 2.19 | 1.13  | 0.0000 | 0.0012 |
| P09543 | 2',3'-cyclic-nucleotide 3'-phosphodiesterase (CNP) (CNPase) (EC 3.1.4.37)                                                                                                                                                                        | CNP                                              | 2.25 | 1.17  | 0.0062 | 0.0458 |
| Q13084 | 39S ribosomal protein L28, mitochondrial (L28mt) (MRP-L28) (Melanoma antigen p15) (Melanoma-associated antigen recognized by T-lymphocytes) (Mitochondrial large ribosomal subunit protein bL28m)                                                | MRPL28, MAAT1                                    | 2.27 | 1.18  | 0.0044 | 0.0404 |
| O43819 | Protein SCO2 homolog, mitochondrial                                                                                                                                                                                                              | SCO2                                             | 2.29 | 1.19  | 0.0068 | 0.0478 |
| P36969 | Phospholipid hydroperoxide glutathione peroxidase, mitochondrial (PHGPx) (EC 1.11.1.12) (Glutathione peroxidase 4) (GPx-4) (GSHGPx-4)                                                                                                            | GPX4                                             | 2.37 | 1.25  | 0.0062 | 0.0458 |
| Q14061 | Cytochrome c oxidase copper chaperone                                                                                                                                                                                                            | COX17                                            | 2.92 | 1.55  | 0.0000 | 0.0001 |
| P54819 | Adenylate kinase 2, mitochondrial (AK2) (EC 2.7.4.3) (ATP-AMP transphosphorylase 2) (ATP-AMP phosphotransferase) (Adenylate monophosphate kinase) (Cleaved into: Adenylate kinase 2, mitochondrial, N-terminally processed)                      | AK2, ADK2                                        | 3.07 | 1.62  | 0.0001 | 0.0017 |
| O95674 | Phosphatidate cytidyltransferase 2 (EC 2.7.7.41) (CDP-DAG synthase 2) (CDP-DG synthase 2) (CDP-diacylglycerol synthase 2) (CDS 2) (CDP-diglyceride pyrophosphorylase 2) (CDP-diglyceride synthase 2) (CTP:phosphatidate cytidyltransferase 2)    | CDS2                                             | 3.20 | 1.68  | 0.0002 | 0.0044 |

**Supplemental Table 4**

**41 differentially expressed mitochondrial proteins between lean and obese subjects identified in intermyofibrillar mitochondria**

| Uniprot ID | Protein Name                                                                                                                                                                                                      | Gene Symbol(s)                                  | Ratio Obese/Lean | log <sub>2</sub> O/L Ratio | p Value | FDR-corrected p Value/q Value |
|------------|-------------------------------------------------------------------------------------------------------------------------------------------------------------------------------------------------------------------|-------------------------------------------------|------------------|----------------------------|---------|-------------------------------|
| O95178     | NADH dehydrogenase [ubiquinone] 1 beta subcomplex subunit 2, mitochondrial (Complex I-AGGG) (CI-AGGG) (NADH-ubiquinone oxidoreductase AGGG subunit)                                                               | NDUF82                                          | 0.25             | -2.01                      | 0.0000  | 0.0000                        |
| Q15119     | [Pyruvate dehydrogenase (acetyl-transferring)] kinase isozyme 2, mitochondrial (EC 2.7.11.2) (Pyruvate dehydrogenase kinase isoform 2) (PDH kinase 2) (PDKII)                                                     | PKD2, PDHK2                                     | 0.28             | -1.81                      | 0.0000  | 0.0000                        |
| P27824     | Calnexin (IP90) (Major histocompatibility complex class I antigen-binding protein p88) (p90)                                                                                                                      | CANX                                            | 0.33             | -1.62                      | 0.0001  | 0.0038                        |
| P11021     | 78 kDa glucose-regulated protein (GRP-78) (Endoplasmic reticulum luminal Ca(2+)-binding protein grp78) (Heat shock 70 kDa protein 5) (Immunoglobulin heavy chain-binding protein) (BiP)                           | HSPA5, GRP78                                    | 0.33             | -1.59                      | 0.0013  | 0.0206                        |
| Q3ZCQ8     | Mitochondrial import inner membrane translocase subunit TIM50                                                                                                                                                     | TIMM50, TIM50, PRO1512                          | 0.34             | -1.54                      | 0.0011  | 0.0201                        |
| Q96CM8     | Acyl-CoA synthetase family member 2, mitochondrial (EC 6.2.1.-)                                                                                                                                                   | ACSF2, UNQ493/PRO1009                           | 0.40             | -1.32                      | 0.0009  | 0.0184                        |
| Q722W9     | 39S ribosomal protein L21, mitochondrial (L21mt) (MRP-L21) (Mitochondrial large ribosomal subunit protein bl21m)                                                                                                  | MRPL21                                          | 0.41             | -1.29                      | 0.0000  | 0.0018                        |
| Q9NYK5     | 39S ribosomal protein L39, mitochondrial (L39mt) (MRP-L39) (39S ribosomal protein L5, mitochondrial) (L5mt) (MRP-L5) (Mitochondrial large ribosomal subunit protein ml39)                                         | MRPL39, C21orf92, MRPL5, RPMLS, MSTP003, PRED22 | 0.41             | -1.29                      | 0.0002  | 0.0058                        |
| O43674     | NADH dehydrogenase [ubiquinone] 1 beta subcomplex subunit 5, mitochondrial (Complex I-SGDH) (CI-SGDH) (NADH-ubiquinone oxidoreductase SGDH subunit)                                                               | NDUF85                                          | 0.42             | -1.26                      | 0.0001  | 0.0025                        |
| Q02252     | Methylmalonate-semialdehyde dehydrogenase [acylating], mitochondrial (MMSDH) (Malonate-semialdehyde dehydrogenase [acylating]) (EC 1.2.1.18) (EC 1.2.1.27) (Aldehyde dehydrogenase family 6 member A1)            | ALDH6A1, MMSDH                                  | 0.43             | -1.22                      | 0.0000  | 0.0009                        |
| P35232     | Prohibitin                                                                                                                                                                                                        | PHB                                             | 0.45             | -1.16                      | 0.0002  | 0.0052                        |
| Q96H51     | Serine/threonine-protein phosphatase PGAM5, mitochondrial (EC 3.1.3.16) (Bcl-XL-binding protein v68) (Phosphoglycerate mutase family member 5)                                                                    | PGAM5                                           | 0.45             | -1.15                      | 0.0042  | 0.0354                        |
| Q16718     | NADH dehydrogenase [ubiquinone] 1 alpha subcomplex subunit 5 (Complex I subunit B13) (Complex I-13kD-B) (CI-13kD-B) (NADH-ubiquinone oxidoreductase 13 kDa-B subunit)                                             | NDUF45                                          | 0.46             | -1.11                      | 0.0002  | 0.0052                        |
| O95139     | NADH dehydrogenase [ubiquinone] 1 beta subcomplex subunit 6 (Complex I-B17) (CI-B17) (NADH-ubiquinone oxidoreductase B17 subunit)                                                                                 | NDUF86                                          | 0.48             | -1.06                      | 0.0001  | 0.0037                        |
| P38117     | Electron transfer flavoprotein subunit beta (Beta-ETF)                                                                                                                                                            | ETF8, FFP585                                    | 0.48             | -1.05                      | 0.0005  | 0.0110                        |
| P21397     | Amine oxidase [flavin-containing] A (EC 1.4.3.4) (Monoamine oxidase type A) (MAO-A)                                                                                                                               | MAOA                                            | 0.48             | -1.05                      | 0.0029  | 0.0275                        |
| P51648     | Fatty aldehyde dehydrogenase (EC 1.2.1.3) (Aldehyde dehydrogenase 10) (Aldehyde dehydrogenase family 3 member A2) (Microsomal aldehyde dehydrogenase)                                                             | ALDH3A2, ALDH10, FALDH                          | 0.54             | -0.89                      | 0.0049  | 0.0390                        |
| Q9P0J1     | [Pyruvate dehydrogenase [acetyl-transferring]]-phosphatase 1, mitochondrial (PDP 1) (EC 3.1.3.43) (Protein phosphatase 2C) (Pyruvate dehydrogenase phosphatase catalytic subunit 1) (PDPC 1)                      | PDP1, PDP, PPM2C                                | 0.54             | -0.89                      | 0.0019  | 0.0217                        |
| P30048     | Thioredoxin-dependent peroxide reductase, mitochondrial (EC 1.11.1.15) (Antioxidant protein 1) (AOP-1) (HBC189) (Peroxiredoxin III) (Prx-III) (Peroxiredoxin-3) (Protein MER5 homolog)                            | PRDX3, AOP1                                     | 0.56             | -0.85                      | 0.0025  | 0.0243                        |
| P08574     | Cytochrome c1, heme protein, mitochondrial (Complex III subunit 4) (Complex III subunit IV) (Cytochrome b-c1 complex subunit 4) (Ubiquinol-cytochrome-c reductase complex cytochrome c1 subunit) (Cytochrome c-1) | CYC1                                            | 0.56             | -0.84                      | 0.0076  | 0.0538                        |
| P28838     | Cytosol aminopeptidase (EC 3.4.11.1) (Leucine aminopeptidase 3) (LAP-3) (Leucyl aminopeptidase) (Peptidase S) (Proline aminopeptidase) (EC 3.4.11.5) (Prolyl aminopeptidase)                                      | LAP3, LAPEP, PEPS                               | 0.57             | -0.81                      | 0.0023  | 0.0234                        |
| Q96199     | Succinate-CoA ligase (GDP-forming) subunit beta, mitochondrial (EC 6.2.1.4) (GTP-specific succinyl-CoA synthetase subunit beta) (G-SCS) (GTPSCS) (Succinyl-CoA synthetase beta-G chain) (SCS-betaG)               | SUCLG2                                          | 0.58             | -0.79                      | 0.0055  | 0.0419                        |
| P05091     | Aldehyde dehydrogenase, mitochondrial (EC 1.2.1.3) (ALDH class 2) (ALDH-E2) (ALDH)                                                                                                                                | ALDH2, ALDM                                     | 0.60             | -0.74                      | 0.0005  | 0.0111                        |
| P18859     | ATP synthase-coupling factor 6, mitochondrial (ATPase subunit F6)                                                                                                                                                 | ATP5J, ATP5A, ATPM                              | 0.61             | -0.71                      | 0.0018  | 0.0217                        |
| P06576     | ATP synthase subunit beta, mitochondrial (EC 3.6.3.14)                                                                                                                                                            | ATP5B, ATPMB, ATP5B                             | 0.64             | -0.64                      | 0.0001  | 0.0025                        |
| Q9Y305     | Acyl-coenzyme A thioesterase 9, mitochondrial (Acyl-CoA thioesterase 9) (EC 3.1.2.-) (Acyl-CoA thioester hydrolase 9)                                                                                             | ACOT9, CGI-16                                   | 0.65             | -0.63                      | 0.0012  | 0.0201                        |
| P30038     | Delta-1-pyrroline-5-carboxylate dehydrogenase, mitochondrial (P5C dehydrogenase) (EC 1.2.1.88) (Aldehyde dehydrogenase family 4 member A1) (L-glutamate gamma-semialdehyde dehydrogenase)                         | ALDH4A1, ALDH4, P5CDH                           | 0.68             | -0.55                      | 0.0016  | 0.0216                        |
| P25705     | ATP synthase subunit alpha, mitochondrial                                                                                                                                                                         | ATP5A1, ATP5A, ATP5A2, ATPM                     | 0.71             | -0.49                      | 0.0069  | 0.0514                        |
| P43155     | Carnitine O-acetyltransferase (Carnitine acetylase) (EC 2.3.1.7) (Carnitine acetyltransferase) (CAT) (CrAT)                                                                                                       | CRAT, CAT1                                      | 1.46             | 0.55                       | 0.0079  | 0.0543                        |
| Q6NVY1     | 3-hydroxyisobutyryl-CoA hydrolase, mitochondrial (EC 3.1.2.4) (3-hydroxyisobutyryl-coenzyme A hydrolase) (HIB-CoA hydrolase) (HIBYL-CoA-H)                                                                        | HIBCH                                           | 1.48             | 0.56                       | 0.0047  | 0.0381                        |
| P24539     | ATP synthase F(0) complex subunit B1, mitochondrial (ATP synthase proton-transporting mitochondrial F(0) complex subunit B1) (ATP synthase subunit b) (ATPase subunit b)                                          | ATP5F1                                          | 1.54             | 0.62                       | 0.0076  | 0.0538                        |
| O75390     | Citrate synthase, mitochondrial (EC 2.3.3.1) (Citrate (S)-synthase)                                                                                                                                               | CS                                              | 1.54             | 0.63                       | 0.0081  | 0.0543                        |
| P03915     | NADH-ubiquinone oxidoreductase chain 5 (EC 1.6.5.3) (NADH dehydrogenase subunit 5)                                                                                                                                | MT-ND5, MTND5, NADH5, ND5                       | 1.70             | 0.76                       | 0.0016  | 0.0216                        |
| O43772     | Mitochondrial carnitine/acylcarnitine carrier protein (Carnitine/acylcarnitine translocase) (CAC) (Solute carrier family 25 member 20)                                                                            | SLC25A20, CAC, CACT                             | 1.93             | 0.95                       | 0.0039  | 0.0336                        |
| Q5JRX3     | Presequence protease, mitochondrial (hPreP) (EC 3.4.24.-) (Pitriysin metalloproteinase 1) (Metalloprotease 1) (hMP1)                                                                                              | PITRM1, KIAA1104, MP1                           | 2.03             | 1.02                       | 0.0023  | 0.0234                        |

|        |                                                                                                                                                                                                                                                               |                                         |      |      |        |        |
|--------|---------------------------------------------------------------------------------------------------------------------------------------------------------------------------------------------------------------------------------------------------------------|-----------------------------------------|------|------|--------|--------|
| P33121 | Long-chain-fatty-acid-CoA ligase 1 (EC 6.2.1.3) (Acyl-CoA synthetase 1) (ACS1) (Long-chain acyl-CoA synthetase 1) (LACS 1) (Long-chain acyl-CoA synthetase 2) (LACS 2) (Long-chain fatty acid-CoA ligase 2) (Palmitoyl-CoA ligase 1) (Palmitoyl-CoA ligase 2) | ACSL1, FAFL1, FAFL2, LACS, LACS1, LACS2 | 2.05 | 1.04 | 0.0016 | 0.0216 |
| P50440 | Glycine amidinotransferase, mitochondrial (EC 2.1.4.1) (L-arginine:glycine amidinotransferase) (Transamidinase)                                                                                                                                               | GATM, AGAT                              | 2.08 | 1.06 | 0.0038 | 0.0336 |
| P11310 | Medium-chain specific acyl-CoA dehydrogenase, mitochondrial (MCAD) (EC 1.3.8.7)                                                                                                                                                                               | ACADM                                   | 2.26 | 1.18 | 0.0020 | 0.0217 |
| Q12931 | Heat shock protein 75 kDa, mitochondrial (HSP 75) (TNFR-associated protein 1) (Tumor necrosis factor type 1 receptor-associated protein) (TRAP-1)                                                                                                             | TRAP1, HSP75                            | 2.28 | 1.19 | 0.0019 | 0.0217 |
| Q9NVH6 | Trimethyllysine dioxygenase, mitochondrial (EC 1.14.11.8) (Epsilon-trimethyllysine 2-oxoglutarate dioxygenase) (Epsilon-trimethyllysine hydroxylase) (TML hydroxylase) (TML-alpha-ketoglutarate dioxygenase) (TML dioxygenase) (TMLD)                         | TMLHE, TMLH                             | 2.31 | 1.21 | 0.0016 | 0.0216 |
| Q9BXW7 | Haloacid dehalogenase-like hydrolase domain-containing 5 (Cat eye syndrome critical region protein 5)                                                                                                                                                         | HDHDS, CECRS                            | 2.67 | 1.42 | 0.0036 | 0.0333 |

**Supplemental Table 5**

**Mapped pathways associated with 73 differentially expressed proteins in subsarcolemmal mitochondria from obese that met false discovery rate criteria ( $P \leq 0.05$ ). Analysis was performed using the Reactome Software.**

| Pathway identifier | Pathway name                                                                                                        | #Entities found | Entities pValue | Entities FDR | Mapped entities                                                                                                                                                                                                                                                                                    |
|--------------------|---------------------------------------------------------------------------------------------------------------------|-----------------|-----------------|--------------|----------------------------------------------------------------------------------------------------------------------------------------------------------------------------------------------------------------------------------------------------------------------------------------------------|
| R-HSA-1428517      | The citric acid (TCA) cycle and respiratory electron transport                                                      | 17              | 1.45E-14        | 5.61E-12     | Q9Y5U8;P51553;P08559;P36957;O95169;Q9H845;P28331;O95139;P50213;O95178;P53985;Q99766;P21912;O43819;Q8NCN5;P42704;P08574                                                                                                                                                                             |
| R-HSA-1268020      | Mitochondrial protein import                                                                                        | 10              | 1.90E-11        | 3.66E-09     | P51553;Q86WU2;O95169;Q14061;Q13505;Q9BVV7;P08574;O60220;O43615;Q16595                                                                                                                                                                                                                              |
| R-HSA-71406        | Pyruvate metabolism and Citric Acid (TCA) cycle                                                                     | 8               | 2.25E-09        | 2.88E-07     | P21912;Q8NCN5;Q9Y5U8;P51553;P36957;P08559;P50213;P53985                                                                                                                                                                                                                                            |
| R-HSA-163200       | Respiratory electron transport, ATP synthesis by chemiosmotic coupling, and heat production by uncoupling proteins. | 10              | 6.00E-08        | 5.76E-06     | Q99766;P21912;O43819;O95169;Q9H845;P42704;P28331;O95139;P08574;O95178                                                                                                                                                                                                                              |
| R-HSA-5368286      | Mitochondrial translation initiation                                                                                | 8               | 9.41E-08        | 7.24E-06     | Q9Y676;Q9NP92;Q9BYD3;P46199;Q9BRJ2;Q13084;Q9H0U6;Q5T653                                                                                                                                                                                                                                            |
| R-HSA-611105       | Respiratory electron transport                                                                                      | 9               | 1.83E-07        | 1.17E-05     | P21912;O43819;O95169;Q9H845;P42704;P28331;O95139;P08574;O95178                                                                                                                                                                                                                                     |
| R-HSA-5368287      | Mitochondrial translation                                                                                           | 8               | 4.37E-07        | 2.41E-05     | Q9Y676;Q9NP92;Q9BYD3;P46199;Q9BRJ2;Q13084;Q9H0U6;Q5T653                                                                                                                                                                                                                                            |
| R-HSA-1430728      | Metabolism                                                                                                          | 41              | 1.57E-06        | 7.54E-05     | P26440;P36969;Q9Y305;O95674;Q9Y5U8;P08559;O75208;Q9H845;O95139;P50213;O95178;P53985;Q99766;Q8NCN5;O43819;Q9BSE5;P05091;P14618-2;P14618-1;P42704;P54819;P55809;P49419;Q16595;P30038;Q16836;P51553;O95169;P36957;P22570;P28331;Q02252;P19367;Q96HY7;P21912;P21953;P17540;P30084;P08574;O14874;Q9NUB1 |
| R-HSA-5389840      | Mitochondrial translation elongation                                                                                | 7               | 2.13E-06        | 8.96E-05     | Q9Y676;Q9NP92;Q9BYD3;Q9BRJ2;Q13084;Q9H0U6;Q5T653                                                                                                                                                                                                                                                   |
| R-HSA-5419276      | Mitochondrial translation termination                                                                               | 7               | 2.45E-06        | 9.31E-05     | Q9Y676;Q9NP92;Q9BYD3;Q9BRJ2;Q13084;Q9H0U6;Q5T653                                                                                                                                                                                                                                                   |
| R-HSA-1362409      | Mitochondrial iron-sulfur cluster biogenesis                                                                        | 2               | 5.83E-06        | 2.04E-04     | P22570;Q16595                                                                                                                                                                                                                                                                                      |
| R-HSA-71403        | Citric acid cycle (TCA cycle)                                                                                       | 4               | 1.02E-05        | 3.27E-04     | P21912;P51553;P36957;P50213                                                                                                                                                                                                                                                                        |
| R-HSA-389661       | Glyoxylate metabolism and glycine degradation                                                                       | 5               | 2.23E-05        | 6.48E-04     | P30038;P21953;P36957;P08559;Q96HY7                                                                                                                                                                                                                                                                 |
| R-HSA-70895        | Branched-chain amino acid catabolism                                                                                | 4               | 2.72E-05        | 7.33E-04     | P26440;P21953;Q02252;O14874                                                                                                                                                                                                                                                                        |
| R-HSA-70268        | Pyruvate metabolism                                                                                                 | 4               | 4.63E-05        | 1.16E-03     | Q8NCN5;Q9Y5U8;P08559;P53985                                                                                                                                                                                                                                                                        |
| R-HSA-6799198      | Complex I biogenesis                                                                                                | 5               | 1.45E-04        | 3.47E-03     | O95169;Q9H845;P28331;O95139;O95178                                                                                                                                                                                                                                                                 |
| R-HSA-71291        | Metabolism of amino acids and derivatives                                                                           | 11              | 1.75E-04        | 3.85E-03     | P30038;P26440;Q9BSE5;P21953;P36957;P08559;P17540;Q02252;O14874;P49419;Q96HY7                                                                                                                                                                                                                       |
| R-HSA-77348        | Beta oxidation of octanoyl-CoA to hexanoyl-CoA                                                                      | 2               | 4.67E-04        | 8.40E-03     | Q16836;P30084                                                                                                                                                                                                                                                                                      |
| R-HSA-77310        | Beta oxidation of lauroyl-CoA to decanoyl-CoA-CoA                                                                   | 2               | 4.67E-04        | 8.40E-03     | Q16836;P30084                                                                                                                                                                                                                                                                                      |
| R-HSA-77350        | Beta oxidation of hexanoyl-CoA to butanoyl-CoA                                                                      | 2               | 4.67E-04        | 8.40E-03     | Q16836;P30084                                                                                                                                                                                                                                                                                      |
| R-HSA-77352        | Beta oxidation of butanoyl-CoA to acetyl-CoA                                                                        | 2               | 4.67E-04        | 8.40E-03     | Q16836;P30084                                                                                                                                                                                                                                                                                      |
| R-HSA-77346        | Beta oxidation of decanoyl-CoA to octanoyl-CoA-CoA                                                                  | 2               | 6.70E-04        | 1.14E-02     | Q16836;P30084                                                                                                                                                                                                                                                                                      |
| R-HSA-77286        | Mitochondrial fatty acid beta-oxidation of saturated fatty acids                                                    | 2               | 2.21E-03        | 3.53E-02     | Q16836;P30084                                                                                                                                                                                                                                                                                      |

**Supplemental Table 6**

**Mapped pathways associated with 41 differentially expressed proteins in intermyofibrillar mitochondria from obese that met false discovery rate criteria ( $P \leq 0.05$ ). Analysis was performed using the Reactome Software.**

| Pathway identifier | Pathway name                                                                                                        | #Entities found | Entities pValue | Entities FDR | Mapped entities                                                                                                                                                                                                              |
|--------------------|---------------------------------------------------------------------------------------------------------------------|-----------------|-----------------|--------------|------------------------------------------------------------------------------------------------------------------------------------------------------------------------------------------------------------------------------|
| R-HSA-1428517      | The citric acid (TCA) cycle and respiratory electron transport                                                      | 16              | 9.99E-16        | 2.49E-13     | O95139;O43674;Q12931;Q15119;P03915;Q16718;O95178;P38117;Q96199;Q9P011;O75390;P25705;P18859;P24539;P08574;P06576                                                                                                              |
| R-HSA-163200       | Respiratory electron transport, ATP synthesis by chemiosmotic coupling, and heat production by uncoupling proteins. | 12              | 6.53E-12        | 8.10E-10     | P25705;P18859;P24539;O95139;O43674;Q12931;P08574;P03915;Q16718;O95178;P38117;P06576                                                                                                                                          |
| R-HSA-611105       | Respiratory electron transport                                                                                      | 8               | 1.70E-07        | 1.41E-05     | O95139;O43674;Q12931;P08574;P03915;Q16718;O95178;P38117                                                                                                                                                                      |
| R-HSA-1268020      | Mitochondrial protein import                                                                                        | 6               | 6.37E-07        | 3.95E-05     | Q5JRX3;O75390;Q32CQ8;P25705;P08574;P06576                                                                                                                                                                                    |
| R-HSA-1430728      | Metabolism                                                                                                          | 31              | 8.16E-07        | 4.00E-05     | Q9Y305;P51648-2;P51648-1;O95139;O43674;O43772;Q15119;O95178;Q96199;Q9P011;O75390;P05091;Q6NVY1;P25705;Q96CM8;P18859;P24539;P43155;P50440;P30038;Q12931;Q02252;P03915;P33121;Q16718;P38117;P11310;P08574;P21397;Q9NVH6;P06576 |
| R-HSA-163210       | Formation of ATP by chemiosmotic coupling                                                                           | 4               | 1.51E-06        | 6.18E-05     | P25705;P18859;P24539;P06576                                                                                                                                                                                                  |
| R-HSA-6799198      | Complex I biogenesis                                                                                                | 5               | 3.01E-05        | 1.05E-03     | O95139;O43674;P03915;Q16718;O95178                                                                                                                                                                                           |
| R-HSA-8949613      | Cristae formation                                                                                                   | 4               | 9.99E-05        | 2.59E-03     | P25705;P18859;P24539;P06576                                                                                                                                                                                                  |
| R-HSA-71406        | Pyruvate metabolism and Citric Acid (TCA) cycle                                                                     | 4               | 1.08E-04        | 2.59E-03     | O75390;Q15119;Q96199;Q9P011                                                                                                                                                                                                  |
| R-HSA-70895        | Branched-chain amino acid catabolism                                                                                | 3               | 2.57E-04        | 5.14E-03     | Q6NVY1;Q02252;Q9NVH6                                                                                                                                                                                                         |
| R-HSA-8978868      | Fatty acid metabolism                                                                                               | 7               | 6.13E-04        | 1.16E-02     | Q9Y305;P51648-2;Q96CM8;O43772;P33121;P43155;P11310                                                                                                                                                                           |
| R-HSA-204174       | Regulation of pyruvate dehydrogenase (PDH) complex                                                                  | 2               | 2.12E-03        | 3.39E-02     | Q15119;Q9P011                                                                                                                                                                                                                |
| R-HSA-77289        | Mitochondrial Fatty Acid Beta-Oxidation                                                                             | 3               | 3.61E-03        | 5.41E-02     | Q9Y305;Q96CM8;P11310                                                                                                                                                                                                         |



**Supplemental Table 7**

**Biological processes by gene ontology (GO) categories in 73 differentially expressed proteins in subsarcolemmal mitochondria from obese that met false discovery rate criteria (P<0.05). Analysis was performed using the STRING database.**

| Pathway ID | Pathway description                                    | Observed gene count | False discovery rate | Matching proteins in your network (IDs)                                                                                                                                                                                                                                                                                                                                                                                                                                                                                                                                                                                                                                               | Matching proteins in your network (labels)                                                                                                                                                                                                                                   |
|------------|--------------------------------------------------------|---------------------|----------------------|---------------------------------------------------------------------------------------------------------------------------------------------------------------------------------------------------------------------------------------------------------------------------------------------------------------------------------------------------------------------------------------------------------------------------------------------------------------------------------------------------------------------------------------------------------------------------------------------------------------------------------------------------------------------------------------|------------------------------------------------------------------------------------------------------------------------------------------------------------------------------------------------------------------------------------------------------------------------------|
| GO.0055114 | oxidation-reduction process                            | 33                  | 2.83E-21             | ENSP00000217901, ENSP00000247866, ENSP00000258770, ENSP00000261733, ENSP00000262507, ENSP00000263035, ENSP00000288050, ENSP00000290597, ENSP00000299166, ENSP00000299518, ENSP00000300051, ENSP00000308334, ENSP00000312618, ENSP00000314649, ENSP00000316924, ENSP00000317159, ENSP00000320171, ENSP00000321070, ENSP00000335304, ENSP00000346103, ENSP00000356218, ENSP00000357535, ENSP00000364649, ENSP00000369134, ENSP00000369176, ENSP00000384774, ENSP00000385638, ENSP00000387123, ENSP00000392709, ENSP00000398064, ENSP00000418397, ENSP00000450436, ENSP00000462972                                                                                                       | ACAD9, ACS1, ALDH2, ALDH4A1, ALDH5A1, ALDH6A1, ALDH7A1, ATP5S, COQ9, CYB5R1, CYC1, DHTKD1, DLST, ECHS1, FDXR, GPX4, HADH, HIGD1A, HK1, IDH3A, IDH3G, IVD, LDHD, ME2, NDUFB2, NDUFB6, NDUFB8, NDUFS1, PDHA1, PDPK, PKM, SDHB, TBRG4                                           |
| GO.0045333 | cellular respiration                                   | 18                  | 3.26E-18             | ENSP00000217901, ENSP00000241052, ENSP00000247866, ENSP00000252785, ENSP00000258770, ENSP00000262507, ENSP00000263035, ENSP00000299166, ENSP00000299518, ENSP00000308334, ENSP00000314649, ENSP00000317159, ENSP00000335304, ENSP00000364649, ENSP00000366482, ENSP00000369134, ENSP00000369176, ENSP00000392709                                                                                                                                                                                                                                                                                                                                                                      | ALDH5A1, ATP5S, CAT, COQ9, CYC1, DHTKD1, DLST, FXN, IDH3A, IDH3G, NDUFB2, NDUFB6, NDUFB8, NDUFS1, PDHA1, SCO2, SDHB, TBRG4                                                                                                                                                   |
| GO.0006091 | generation of precursor metabolites and energy         | 21                  | 5.59E-16             | ENSP00000217901, ENSP00000241052, ENSP00000247866, ENSP00000252785, ENSP00000258770, ENSP00000261070, ENSP00000263035, ENSP00000299166, ENSP00000299518, ENSP00000308334, ENSP00000314649, ENSP00000317159, ENSP00000320171, ENSP00000335304, ENSP00000364649, ENSP00000366482, ENSP00000369176, ENSP00000384774, ENSP00000392709, ENSP00000462972                                                                                                                                                                                                                                                                                                                                    | ALDH5A1, ATP5S, CAT, COQ9, COX17, CYC1, DHTKD1, DLST, FDXR, FXN, HK1, IDH3A, IDH3G, NDUFB2, NDUFB6, NDUFB8, NDUFS1, PKM, SCO2, SDHB, TBRG4                                                                                                                                   |
| GO.0007005 | mitochondrion organization                             | 18                  | 3.33E-12             | ENSP00000169551, ENSP00000199706, ENSP00000253099, ENSP00000263629, ENSP00000270538, ENSP00000308901, ENSP00000312599, ENSP00000312618, ENSP00000340278, ENSP00000356001, ENSP00000357369, ENSP00000371959, ENSP00000366482, ENSP00000373404, ENSP00000377470, ENSP00000379057, ENSP00000392709, ENSP00000424328                                                                                                                                                                                                                                                                                                                                                                      | ACAD9, CNP, FXN, MRPL18, MRPL2, MRPL28, MRPL4, MRPL45, MRPS30, MTF2, MTF1, NDUFS1, PARK7, MTCR7, TIMM21, TIMM44, TIMM8A, TMEM70                                                                                                                                              |
| GO.0044281 | small molecule metabolic process                       | 32                  | 3.89E-11             | ENSP00000219794, ENSP00000247866, ENSP00000254035, ENSP00000261733, ENSP00000263035, ENSP00000288050, ENSP00000290597, ENSP00000299166, ENSP00000299518, ENSP00000308334, ENSP00000314649, ENSP00000317159, ENSP00000318351, ENSP00000321070, ENSP00000340278, ENSP00000346103, ENSP00000346921, ENSP00000354223, ENSP00000356218, ENSP00000357535, ENSP00000358640, ENSP00000364986, ENSP00000369176, ENSP00000377470, ENSP00000384774, ENSP00000385638, ENSP00000387123, ENSP00000392709, ENSP00000418397, ENSP00000450436, ENSP00000462972                                                                                                                                         | AGMAT, AK2, ALDH2, ALDH4A1, ALDH5A1, ALDH6A1, ALDH7A1, ATP5S, BCKDK, BCKDK, CDS2, CKMT2, CNP, CYB5R1, CYC1, DHTKD1, ECHS1, FDXR, GPX4, HADH, HK1, IDH3A, IVD, ME2, MPC1, NDUFB2, NDUFB6, NDUFB8, NDUFS1, PARK7, PDPK, SLC16A1                                                |
| GO.1901564 | organonitrogen compound metabolic process              | 28                  | 7.00E-11             | ENSP00000199706, ENSP00000217901, ENSP00000219794, ENSP00000241052, ENSP00000247866, ENSP00000253099, ENSP00000254035, ENSP00000262507, ENSP00000263035, ENSP00000263629, ENSP00000263035, ENSP00000299166, ENSP00000308334, ENSP00000308901, ENSP00000318351, ENSP00000346921, ENSP00000356001, ENSP00000364986, ENSP00000366482, ENSP00000369134, ENSP00000369176, ENSP00000373404, ENSP00000384774, ENSP00000387123, ENSP00000392709, ENSP00000418397, ENSP00000424328, ENSP00000450436                                                                                                                                                                                            | AGMAT, AK2, ALDH4A1, ALDH6A1, ALDH7A1, ATP5S, BCKDK, BCKDK, CAT, CKMT2, COQ9, DHTKD1, FXN, HK1, IDH3G, IVD, MRPL18, MRPL2, MRPL28, MRPL4, MRPL45, MRPS30, MTF2, NDUFB2, NDUFB6, NDUFB8, NDUFS1, PDHA1                                                                        |
| GO.0019752 | carboxylic acid metabolic process                      | 21                  | 1.15E-10             | ENSP00000219794, ENSP00000254035, ENSP00000263035, ENSP00000288050, ENSP00000290597, ENSP00000299518, ENSP00000314649, ENSP00000316924, ENSP00000318351, ENSP00000321070, ENSP00000340278, ENSP00000346103, ENSP00000354223, ENSP00000357535, ENSP00000358640, ENSP00000364986, ENSP00000369176, ENSP00000384774, ENSP00000385638, ENSP00000387123, ENSP00000418397, ENSP00000450436                                                                                                                                                                                                                                                                                                  | ACCS1, AGMAT, ALDH4A1, ALDH5A1, ALDH6A1, ALDH7A1, BCKDK, BCKDK, CKMT2, DHTKD1, ECHS1, GPX4, HADH, HK1, IDH3A, IVD, ME2, MPC1, PARK7, PDPK, SLC16A1                                                                                                                           |
| GO.0055086 | nucleobase-containing small molecule metabolic process | 16                  | 1.09E-08             | ENSP00000217901, ENSP00000241052, ENSP00000247866, ENSP00000262507, ENSP00000263035, ENSP00000299166, ENSP00000308334, ENSP00000335304, ENSP00000346921, ENSP00000366482, ENSP00000369134, ENSP00000369176, ENSP00000377470, ENSP00000384774, ENSP00000392709, ENSP000004050436                                                                                                                                                                                                                                                                                                                                                                                                       | AK2, ALDH6A1, ATP5S, CAT, CNP, COQ9, DHTKD1, DLST, FXN, HK1, IDH3G, NDUFB2, NDUFB6, NDUFB8, NDUFS1, PDHA1                                                                                                                                                                    |
| GO.0009060 | aerobic respiration                                    | 8                   | 1.15E-08             | ENSP00000217901, ENSP00000241052, ENSP00000263035, ENSP00000299518, ENSP00000335304, ENSP00000364649, ENSP00000366482, ENSP00000369134                                                                                                                                                                                                                                                                                                                                                                                                                                                                                                                                                | CAT, DHTKD1, DLST, FXN, IDH3A, IDH3G, PDHA1, SDHB                                                                                                                                                                                                                            |
| GO.0046034 | ATP metabolic process                                  | 11                  | 1.18E-08             | ENSP00000247866, ENSP00000262507, ENSP00000263035, ENSP00000299166, ENSP00000308334, ENSP00000346921, ENSP00000366482, ENSP00000369134, ENSP00000369176, ENSP00000384774, ENSP00000392709                                                                                                                                                                                                                                                                                                                                                                                                                                                                                             | AK2, ATP5S, COQ9, DHTKD1, FXN, HK1, NDUFB2, NDUFB6, NDUFB8, NDUFS1, PDHA1                                                                                                                                                                                                    |
| GO.0044710 | single-organism metabolic process                      | 39                  | 1.55E-08             | ENSP00000199706, ENSP00000217901, ENSP00000247866, ENSP00000253099, ENSP00000254035, ENSP00000258770, ENSP00000261733, ENSP00000263035, ENSP00000263629, ENSP00000290597, ENSP00000299166, ENSP00000299518, ENSP00000300051, ENSP00000308334, ENSP00000308901, ENSP00000312618, ENSP00000317159, ENSP00000321070, ENSP00000346103, ENSP00000346921, ENSP00000354223, ENSP00000356001, ENSP00000356218, ENSP00000357535, ENSP00000364986, ENSP00000366482, ENSP00000369176, ENSP00000373404, ENSP00000377470, ENSP00000384774, ENSP00000385638, ENSP00000387123, ENSP00000392709, ENSP00000398064, ENSP00000418397, ENSP00000419879, ENSP00000424328, ENSP00000450436, ENSP00000462972 | ACAD9, AGMAT, AK2, ALDH2, ALDH4A1, ALDH6A1, ALDH7A1, ATP5S, BCKDK, CDS2, CKMT2, CNP, CYB5R1, CYC1, DHTKD1, ECHS1, FDXR, FXN, GPX4, HADH, HIGD1A, HK1, IDH3A, IVD, LDHD, ME2, MPC1, MRPL18, MRPL2, MRPL28, MRPL4, MRPL45, MRPS30, MTF2, NDUFB2, NDUFB6, NDUFB8, NDUFS1, TBRG4 |
| GO.0022904 | respiratory electron transport chain                   | 10                  | 1.77E-08             | ENSP00000247866, ENSP00000252785, ENSP00000262507, ENSP00000299166, ENSP00000308334, ENSP00000314649, ENSP00000317159, ENSP00000364649, ENSP00000369176, ENSP00000392709                                                                                                                                                                                                                                                                                                                                                                                                                                                                                                              | ALDH5A1, ATP5S, COQ9, CYC1, NDUFB2, NDUFB6, NDUFB8, NDUFS1, SCO2, SDHB                                                                                                                                                                                                       |
| GO.0009117 | nucleotide metabolic process                           | 15                  | 2.41E-08             | ENSP00000217901, ENSP00000241052, ENSP00000247866, ENSP00000262507, ENSP00000263035, ENSP00000299166, ENSP00000308334, ENSP00000335304, ENSP00000346921, ENSP00000366482, ENSP00000369134, ENSP00000369176, ENSP00000377470, ENSP00000384774, ENSP00000392709                                                                                                                                                                                                                                                                                                                                                                                                                         | AK2, ATP5S, CAT, CNP, COQ9, DHTKD1, DLST, FXN, HK1, IDH3G, NDUFB2, NDUFB6, NDUFB8, NDUFS1, PDHA1                                                                                                                                                                             |
| GO.0044282 | small molecule catabolic process                       | 12                  | 2.90E-08             | ENSP00000219794, ENSP00000261733, ENSP00000290597, ENSP00000314649, ENSP00000318351, ENSP00000335304, ENSP00000340278, ENSP00000357535, ENSP00000385638, ENSP00000387123, ENSP00000418397, ENSP00000450436                                                                                                                                                                                                                                                                                                                                                                                                                                                                            | ALDH2, ALDH4A1, ALDH5A1, ALDH6A1, ALDH7A1, BCKDK, BCKDK, DLST, ECHS1, HADH, IVD, PARK7                                                                                                                                                                                       |
| GO.0019637 | organophosphate metabolic process                      | 18                  | 3.85E-08             | ENSP00000217901, ENSP00000241052, ENSP00000247866, ENSP00000262507, ENSP00000263035, ENSP00000299166, ENSP00000308334, ENSP00000314649, ENSP00000335304, ENSP00000346921, ENSP00000346921, ENSP00000366482, ENSP00000369134, ENSP00000369176, ENSP00000377470, ENSP00000384774, ENSP00000392709, ENSP00000419879                                                                                                                                                                                                                                                                                                                                                                      | AK2, ALDH5A1, ATP5S, CAT, CDS2, CNP, COQ9, DHTKD1, DLST, FXN, GPX4, HK1, IDH3G, NDUFB2, NDUFB6, NDUFB8, NDUFS1, PDHA1                                                                                                                                                        |

|            |                                                 |    |          |                                                                                                                                                                                                                                                                                                                                                 |                                                                                                                                                   |
|------------|-------------------------------------------------|----|----------|-------------------------------------------------------------------------------------------------------------------------------------------------------------------------------------------------------------------------------------------------------------------------------------------------------------------------------------------------|---------------------------------------------------------------------------------------------------------------------------------------------------|
| GO.0044712 | single-organism catabolic process               | 18 | 1.73E-07 | ENSP00000219794,ENSP00000241052,ENSP00000261733,ENSP00000263035,ENSP00000290597,ENSP00000308334,ENSP00000308901,ENSP00000316924,ENSP00000320171,ENSP00000335304,ENSP00000340278,ENSP00000357535,ENSP00000369134,ENSP00000377470,ENSP00000384774,ENSP00000385638,ENSP00000387123,ENSP00000418397,ENSP00000450436                                 | ALDH2, ALDH4A1, ALDH5A1, ALDH6A1, ALDH7A1, BCKDHB, BCKDK, CAT, CNP, DHTKD1, DLST, ECHS1, HADH, HK1, IVD, PARK7, PDHA1, PKM                        |
| GO.0006099 | tricarboxylic acid cycle                        | 6  | 2.72E-07 | ENSP00000217901,ENSP00000263035,ENSP00000299518,ENSP00000335304,ENSP00000364649,ENSP00000369134                                                                                                                                                                                                                                                 | DHTKD1, DLST, IDH3A, IDH3G, PDHA1, SDHB                                                                                                           |
| GO.0044711 | single-organism biosynthetic process            | 21 | 3.17E-07 | ENSP00000199706,ENSP00000253099,ENSP00000262507,ENSP00000263629,ENSP00000290597,ENSP00000308334,ENSP00000308901,ENSP00000316924,ENSP00000320171,ENSP00000335304,ENSP00000340278,ENSP00000357535,ENSP00000369134,ENSP00000377470,ENSP00000384774,ENSP00000385638,ENSP00000387123,ENSP00000418397,ENSP00000450436                                 | ACSS1, AGMAT, AK2, ALDH4A1, ALDH7A1, ATP5S, CDS2, COQ9, CYB5R1, FDXR, FXN, MRPL18, MRPL2, MRPL28, MRPL4, MRPL45, MRPS30, MTIF2, PARK7, PDHA1, PKM |
| GO.0006163 | purine nucleotide metabolic process             | 12 | 3.17E-07 | ENSP00000241052,ENSP00000247866,ENSP00000262507,ENSP00000263035,ENSP00000299166,ENSP00000308334,ENSP00000346921,ENSP00000366482,ENSP00000369134,ENSP00000377470,ENSP00000384774,ENSP00000392709                                                                                                                                                 | AK2, ATP5S, CAT, COQ9, DHTKD1, FXN, HK1, NDUFB2, NDUFB6, NDUFB8, NDUFS1, PDHA1                                                                    |
| GO.0046395 | carboxylic acid catabolic process               | 10 | 3.38E-07 | ENSP00000219794,ENSP00000290597,ENSP00000314649,ENSP00000318351,ENSP00000335304,ENSP00000357535,ENSP00000385638,ENSP00000387123,ENSP00000418397,ENSP00000450436                                                                                                                                                                                 | ALDH4A1, ALDH5A1, ALDH6A1, ALDH7A1, BCKDHB, BCKDK, DLST, ECHS1, HADH, IVD                                                                         |
| GO.0006733 | oxidoreduction coenzyme metabolic process       | 8  | 5.43E-07 | ENSP00000217901,ENSP00000262507,ENSP00000263035,ENSP00000320171,ENSP00000335304,ENSP00000369134,ENSP00000384774,ENSP00000462972                                                                                                                                                                                                                 | COQ9, DHTKD1, DLST, FDXR, HK1, IDH3G, PDHA1, PKM                                                                                                  |
| GO.0009063 | cellular amino acid catabolic process           | 8  | 8.28E-07 | ENSP00000219794,ENSP00000290597,ENSP00000314649,ENSP00000318351,ENSP00000335304,ENSP00000387123,ENSP00000418397,ENSP00000450436                                                                                                                                                                                                                 | ALDH4A1, ALDH5A1, ALDH6A1, ALDH7A1, BCKDHB, BCKDK, DLST, IVD                                                                                      |
| GO.0070124 | mitochondrial translational initiation          | 7  | 6.24E-06 | ENSP00000199706,ENSP00000253099,ENSP00000263629,ENSP00000308901,ENSP00000356001,ENSP00000373404,ENSP00000424328                                                                                                                                                                                                                                 | MRPL18, MRPL2, MRPL28, MRPL4, MRPL45, MRPS30, MTIF2                                                                                               |
| GO.0032787 | monocarboxylic acid metabolic process           | 12 | 1.47E-05 | ENSP00000263035,ENSP00000288050,ENSP00000290597,ENSP00000314649,ENSP00000316924,ENSP00000340278,ENSP00000346103,ENSP00000354223,ENSP00000357535,ENSP00000358640,ENSP00000384774,ENSP00000385638                                                                                                                                                 | ACSS1, ALDH4A1, ALDH5A1, DHTKD1, ECHS1, GPX4, HADH, HK1, MPC1, PARK7, PDPR, SLC16A1                                                               |
| GO.0006839 | mitochondrial transport                         | 8  | 1.63E-05 | ENSP00000169551,ENSP00000270538,ENSP00000308334,ENSP00000354223,ENSP00000356001,ENSP0000037360,ENSP00000361993,ENSP00000377470                                                                                                                                                                                                                  | ATP5S, CNP, MPC1, MRPL18, MTX1, TIMM21, TIMM44, TIMM8A                                                                                            |
| GO.0032543 | mitochondrial translation                       | 7  | 2.91E-05 | ENSP00000199706,ENSP00000253099,ENSP00000263629,ENSP00000308901,ENSP00000356001,ENSP00000373404,ENSP00000424328                                                                                                                                                                                                                                 | MRPL18, MRPL2, MRPL28, MRPL4, MRPL45, MRPS30, MTIF2                                                                                               |
| GO.0006796 | phosphate-containing compound metabolic process | 21 | 3.98E-05 | ENSP00000217901,ENSP00000219794,ENSP00000241052,ENSP00000247866,ENSP00000254035,ENSP00000258770,ENSP00000262507,ENSP00000263035,ENSP00000299166,ENSP00000308334,ENSP00000314649,ENSP00000335304,ENSP00000346103,ENSP00000346921,ENSP00000366482,ENSP00000369134,ENSP00000369176,ENSP00000377470,ENSP00000384774,ENSP00000392709,ENSP00000419879 | AK2, ALDH5A1, ATP5S, BCKDK, CAT, CDS2, CKMT2, CNP, COQ9, DHTKD1, DLST, FXN, GPX4, HK1, IDH3G, NDUFB2, NDUFB6, NDUFB8, NDUFS1, PDHA1, TBG4         |
| GO.0006119 | oxidative phosphorylation                       | 6  | 4.00E-05 | ENSP00000247866,ENSP00000262507,ENSP00000299166,ENSP00000366482,ENSP00000369176,ENSP00000392709                                                                                                                                                                                                                                                 | COQ9, FXN, NDUFB2, NDUFB6, NDUFB8, NDUFS1                                                                                                         |
| GO.0006520 | cellular amino acid metabolic process           | 10 | 4.25E-05 | ENSP00000219794,ENSP00000254035,ENSP00000290597,ENSP00000314649,ENSP00000318351,ENSP00000335304,ENSP00000364986,ENSP00000387123,ENSP00000418397,ENSP00000450436                                                                                                                                                                                 | AGMAT, ALDH4A1, ALDH5A1, ALDH6A1, ALDH7A1, BCKDHB, BCKDK, CKMT2, DLST, IVD                                                                        |
| GO.0006793 | phosphorus metabolic process                    | 21 | 5.65E-05 | ENSP00000217901,ENSP00000219794,ENSP00000241052,ENSP00000247866,ENSP00000254035,ENSP00000258770,ENSP00000262507,ENSP00000263035,ENSP00000299166,ENSP00000308334,ENSP00000314649,ENSP00000335304,ENSP00000346103,ENSP00000346921,ENSP00000366482,ENSP00000368605,ENSP00000369176,ENSP00000377470,ENSP00000384774,ENSP00000392709,ENSP00000419879 | ACOT9, AK2, ALDH5A1, ATP5S, BCKDK, CAT, CDS2, CKMT2, CNP, COQ9, DHTKD1, DLST, FXN, GPX4, HK1, IDH3G, NDUFB2, NDUFB6, NDUFB8, NDUFS1, TBG4         |
| GO.0046496 | nicotinamide nucleotide metabolic process       | 6  | 9.88E-05 | ENSP00000217901,ENSP00000263035,ENSP00000320171,ENSP00000335304,ENSP00000369134,ENSP00000384774                                                                                                                                                                                                                                                 | DHTKD1, DLST, HK1, IDH3G, PDHA1, PKM                                                                                                              |
| GO.0043648 | dicarboxylic acid metabolic process             | 6  | 0.000103 | ENSP00000217901,ENSP00000290597,ENSP00000314649,ENSP00000321070,ENSP00000335304,ENSP00000364649                                                                                                                                                                                                                                                 | ALDH4A1, ALDH5A1, DLST, IDH3G, ME2, SDHB                                                                                                          |

|            |                                                        |    |          |                                                                                                                                                                                                                                                                                                 |                                                                                                                            |
|------------|--------------------------------------------------------|----|----------|-------------------------------------------------------------------------------------------------------------------------------------------------------------------------------------------------------------------------------------------------------------------------------------------------|----------------------------------------------------------------------------------------------------------------------------|
| GO.0009083 | branched-chain amino acid catabolic process            | 4  | 0.000103 | ENSP00000219794,ENSP00000318351,ENSP00000418397,ENSP00000450436                                                                                                                                                                                                                                 | ALDH6A1, BCKDHB, BCKDK, IVD                                                                                                |
| GO.0051186 | cofactor metabolic process                             | 9  | 0.000128 | ENSP00000217901,ENSP00000262507,ENSP00000263035,ENSP00000320171,ENSP00000335304,ENSP00000366482,ENSP00000368605,ENSP00000384774,ENSP00000462972                                                                                                                                                 | ACOT9, COQ9, DHTKD1, DLST, FDXR, FXN, HK1, IDH3G, PKM                                                                      |
| GO.0070125 | mitochondrial translational elongation                 | 6  | 0.000128 | ENSP00000199706,ENSP00000253099,ENSP00000308901,ENSP00000356001,ENSP00000373404,ENSP00000424328                                                                                                                                                                                                 | MRPL18, MRPL2, MRPL28, MRPL4, MRPL45, MRPS30                                                                               |
| GO.0070126 | mitochondrial translational termination                | 6  | 0.000128 | ENSP00000199706,ENSP00000253099,ENSP00000308901,ENSP00000356001,ENSP00000373404,ENSP00000424328                                                                                                                                                                                                 | MRPL18, MRPL2, MRPL28, MRPL4, MRPL45, MRPS30                                                                               |
| GO.0006120 | mitochondrial electron transport, NADH to ubiquinone   | 5  | 0.000133 | ENSP00000247866,ENSP00000262507,ENSP00000299166,ENSP00000369176,ENSP00000392709                                                                                                                                                                                                                 | COQ9, NDUFB2, NDUFB6, NDUFB8, NDUFS1                                                                                       |
| GO.0046031 | ADP metabolic process                                  | 5  | 0.000178 | ENSP00000263035,ENSP00000320171,ENSP00000346921,ENSP00000369134,ENSP00000384774                                                                                                                                                                                                                 | AK2, DHTKD1, HK1, PDHA1, PKM                                                                                               |
| GO.1901565 | organonitrogen compound catabolic process              | 9  | 0.000231 | ENSP00000219794,ENSP00000241052,ENSP00000290597,ENSP00000314649,ENSP00000318351,ENSP00000335304,ENSP00000387123,ENSP00000418397,ENSP00000450436                                                                                                                                                 | ALDH4A1, ALDH5A1, ALDH6A1, ALDH7A1, BCKDHB, BCKDK, CAT, DLST, IVD                                                          |
| GO.1901605 | alpha-amino acid metabolic process                     | 8  | 0.000236 | ENSP00000254035,ENSP00000290597,ENSP00000314649,ENSP00000335304,ENSP00000364986,ENSP00000387123,ENSP00000418397,ENSP00000450436                                                                                                                                                                 | AGMAT, ALDH4A1, ALDH5A1, ALDH6A1, ALDH7A1, CKMT2, DLST, IVD                                                                |
| GO.1901575 | organic substance catabolic process                    | 18 | 0.000246 | ENSP00000219794,ENSP00000241052,ENSP00000261733,ENSP00000263035,ENSP00000290597,ENSP00000314649,ENSP00000318351,ENSP00000320171,ENSP00000335304,ENSP00000340278,ENSP00000357535,ENSP00000369134,ENSP00000377470,ENSP00000384774,ENSP00000385638,ENSP00000387123,ENSP00000418397,ENSP00000450436 | ALDH2, ALDH4A1, ALDH5A1, ALDH6A1, ALDH7A1, BCKDHB, BCKDK, CAT, CNP, DHTKD1, DLST, ECHS1, HADH, HK1, IVD, PARK7, PDHA1, PKM |
| GO.0006732 | coenzyme metabolic process                             | 8  | 0.000266 | ENSP00000217901,ENSP00000262507,ENSP00000263035,ENSP00000320171,ENSP00000335304,ENSP00000368605,ENSP00000384774,ENSP00000462972                                                                                                                                                                 | ACOT9, COQ9, DHTKD1, DLST, FDXR, HK1, IDH3G, PKM                                                                           |
| GO.1901566 | organonitrogen compound biosynthetic process           | 14 | 0.000428 | ENSP00000199706,ENSP00000253099,ENSP00000263629,ENSP00000290597,ENSP00000308334,ENSP00000308901,ENSP00000320171,ENSP00000346921,ENSP00000356001,ENSP00000364986,ENSP00000366482,ENSP00000373404,ENSP00000387123,ENSP00000424328                                                                 | AGMAT, AK2, ALDH4A1, ALDH7A1, ATP5S, FXN, MRPL18, MRPL2, MRPL28, MRPL4, MRPL45, MRPS30, MTIF2, PKM                         |
| GO.0042775 | mitochondrial ATP synthesis coupled electron transport | 5  | 0.000465 | ENSP00000247866,ENSP00000262507,ENSP00000299166,ENSP00000369176,ENSP00000392709                                                                                                                                                                                                                 | COQ9, NDUFB2, NDUFB6, NDUFB8, NDUFS1                                                                                       |
| GO.0006090 | pyruvate metabolic process                             | 5  | 0.000498 | ENSP00000263035,ENSP00000288050,ENSP00000354223,ENSP00000358640,ENSP00000384774                                                                                                                                                                                                                 | DHTKD1, HK1, MPC1, PDPR, SLC16A1                                                                                           |
| GO.0006734 | NADH metabolic process                                 | 4  | 0.00113  | ENSP00000217901,ENSP00000320171,ENSP00000335304,ENSP00000384774                                                                                                                                                                                                                                 | DLST, HK1, IDH3G, PKM                                                                                                      |
| GO.0046939 | nucleotide phosphorylation                             | 5  | 0.00123  | ENSP00000263035,ENSP00000320171,ENSP00000346921,ENSP00000369134,ENSP00000384774                                                                                                                                                                                                                 | AK2, DHTKD1, HK1, PDHA1, PKM                                                                                               |
| GO.0014854 | response to inactivity                                 | 3  | 0.00123  | ENSP00000241052,ENSP00000320171,ENSP00000357057                                                                                                                                                                                                                                                 | CASQ1, CAT, PKM                                                                                                            |
| GO.0016310 | phosphorylation                                        | 14 | 0.00153  | ENSP00000219794,ENSP00000247866,ENSP00000254035,ENSP00000258770,ENSP00000262507,ENSP00000263035,ENSP00000299166,ENSP00000320171,ENSP00000346921,ENSP00000366482,ENSP00000369134,ENSP00000369176,ENSP00000384774,ENSP00000392709                                                                 | AK2, BCKDK, CKMT2, COQ9, DHTKD1, FXN, HK1, NDUFB2, NDUFB6, NDUFB8, NDUFS1, PDHA1, PKM, TBRG4                               |

|            |                                          |    |         |                                                                                                                                                                                                                                                                                                                                                                                                                                                                                                                                                                                                                                                                                                                                                                                 |                                                                                                                                                                                                                                                                                                                                                              |
|------------|------------------------------------------|----|---------|---------------------------------------------------------------------------------------------------------------------------------------------------------------------------------------------------------------------------------------------------------------------------------------------------------------------------------------------------------------------------------------------------------------------------------------------------------------------------------------------------------------------------------------------------------------------------------------------------------------------------------------------------------------------------------------------------------------------------------------------------------------------------------|--------------------------------------------------------------------------------------------------------------------------------------------------------------------------------------------------------------------------------------------------------------------------------------------------------------------------------------------------------------|
| GO.1901606 | alpha-amino acid catabolic process       | 5  | 0.00172 | ENSP00000290597,ENSP00000335304,ENSP00000387123,ENSP00000418397,ENSP00000450436                                                                                                                                                                                                                                                                                                                                                                                                                                                                                                                                                                                                                                                                                                 | ALDH4A1, ALDH6A1, ALDH7A1, DLST, IVD                                                                                                                                                                                                                                                                                                                         |
| GO.0044238 | primary metabolic process                | 45 | 0.00184 | ENSP00000169551,ENSP00000196371,ENSP00000199706,ENSP00000219794,ENSP00000247866,ENSP00000252785,ENSP00000253099,ENSP00000254035,ENSP00000258770,ENSP00000260665,ENSP00000261733,ENSP00000262507,ENSP00000263035,ENSP00000263629,ENSP00000270538,ENSP00000290597,ENSP00000299166,ENSP00000299518,ENSP00000308334,ENSP00000308901,ENSP00000316924,ENSP00000318351,ENSP00000346103,ENSP00000346921,ENSP00000356001,ENSP00000356218,ENSP00000357360,ENSP00000357535,ENSP00000358640,ENSP00000361993,ENSP00000364649,ENSP00000364986,ENSP00000366482,ENSP00000369176,ENSP00000373404,ENSP00000377470,ENSP00000384774,ENSP00000385638,ENSP00000387123,ENSP00000392709,ENSP00000418397,ENSP00000419879,ENSP00000424328,ENSP00000450436,ENSP00000462972                                 | ACSS1, AGMAT, AK2, ALDH2, ALDH4A1, ALDH6A1, ALDH7A1, ATP5S, BCKDHB, BCKDK, CDS2, CKMT2, CNP, COQ9, CYB5R1, DHTKD1, ECHS1, FDXR, FXN, GPX4, HADH, HK1, IDH3A, IVD, LRPPRC, MRPL18, MRPL2, MRPL28, MRPL4, MRPL45, MRPS30, MTF12, MTX1, NDUFB2, NDUFB6, NDUFB8, NDUFS1, OXCT1, SCO2, SDHB, SLC16A1, TBRG4, TIMM21, TIMM44, TIMM8A                               |
| GO.0006096 | glycolytic process                       | 4  | 0.00198 | ENSP00000263035,ENSP00000320171,ENSP00000369134,ENSP00000384774                                                                                                                                                                                                                                                                                                                                                                                                                                                                                                                                                                                                                                                                                                                 | DHTKD1, HK1, PDHA1, PKM                                                                                                                                                                                                                                                                                                                                      |
| GO.0032984 | macromolecular complex disassembly       | 7  | 0.00249 | ENSP00000199706,ENSP00000253099,ENSP00000263629,ENSP00000308901,ENSP00000356001,ENSP00000373404,ENSP00000424328                                                                                                                                                                                                                                                                                                                                                                                                                                                                                                                                                                                                                                                                 | MRPL18, MRPL2, MRPL28, MRPL4, MRPL45, MRPS30, MTF12                                                                                                                                                                                                                                                                                                          |
| GO.0044237 | cellular metabolic process               | 44 | 0.00317 | ENSP00000169551,ENSP00000199706,ENSP00000219794,ENSP00000247866,ENSP00000253099,ENSP00000254035,ENSP00000260665,ENSP00000261070,ENSP00000261733,ENSP00000263035,ENSP00000263629,ENSP00000270538,ENSP00000288050,ENSP00000290597,ENSP00000299166,ENSP00000299518,ENSP00000308334,ENSP00000308901,ENSP00000312618,ENSP00000318351,ENSP00000321070,ENSP00000346103,ENSP00000346921,ENSP00000354223,ENSP00000356001,ENSP00000356218,ENSP00000357360,ENSP00000357535,ENSP00000358640,ENSP00000361993,ENSP00000364986,ENSP00000366482,ENSP00000368605,ENSP00000369176,ENSP00000373404,ENSP00000377470,ENSP00000384774,ENSP00000385638,ENSP00000387123,ENSP00000392709,ENSP00000418397,ENSP00000419879,ENSP00000424328,ENSP00000450436,ENSP00000462972                                 | ACOT9, AGMAT, AK2, ALDH2, ALDH4A1, ALDH6A1, ALDH7A1, ATP5S, BCKDHB, BCKDK, CDS2, CKMT2, CNP, COX17, CYC1, DHTKD1, ECHS1, FDXR, FXN, GPX4, HADH, HK1, IDH3A, IVD, LRPPRC, ME2, MPC1, MRPL18, MRPL2, MRPL28, MRPL4, MRPL45, MRPS30, MTF12, MTX1, NDUFB2, NDUFB6, NDUFB8, NDUFS1, PDPR, SLC16A1, TIMM21, TIMM44, TIMM8A                                         |
| GO.0006083 | acetate metabolic process                | 2  | 0.00564 | ENSP00000314649,ENSP00000316924                                                                                                                                                                                                                                                                                                                                                                                                                                                                                                                                                                                                                                                                                                                                                 | ACSS1, ALDH5A1                                                                                                                                                                                                                                                                                                                                               |
| GO.0008152 | metabolic process                        | 47 | 0.0064  | ENSP00000169551,ENSP00000199706,ENSP00000219794,ENSP00000247866,ENSP00000253099,ENSP00000254035,ENSP00000260665,ENSP00000261070,ENSP00000261733,ENSP00000263035,ENSP00000263629,ENSP00000270538,ENSP00000290597,ENSP00000299166,ENSP00000299518,ENSP00000300051,ENSP00000308334,ENSP00000308901,ENSP00000312618,ENSP00000317159,ENSP00000321070,ENSP00000326693,ENSP00000346103,ENSP00000346921,ENSP00000354223,ENSP00000356001,ENSP00000356218,ENSP00000357360,ENSP00000357535,ENSP00000361616,ENSP00000361993,ENSP00000364986,ENSP00000366482,ENSP00000368517,ENSP00000368605,ENSP00000369176,ENSP00000373404,ENSP00000384774,ENSP00000385638,ENSP00000387123,ENSP00000392709,ENSP00000398064,ENSP00000418397,ENSP00000419879,ENSP00000424328,ENSP00000450436,ENSP00000462972 | ACAD9, ACOT9, AGMAT, AK2, ALDH2, ALDH4A1, ALDH6A1, ALDH7A1, ATP5S, BCKDHB, BCKDK, CDS2, CKMT2, COMTD1, COX17, CYB5R1, CYC1, DHTKD1, ECHD3, ECHS1, FDXR, FXN, GPX4, HADH, HIGD1A, HK1, IDH3A, IVD, LDHD, LRPPRC, ME2, MPC1, MRPL18, MRPL2, MRPL28, MRPL4, MRPL45, MRPS30, MTF12, MTX1, NDUFB2, NDUFB6, NDUFB8, NDUFS1, PDPR, SLC25A42, TIMM21, TIMM44, TIMM8A |
| GO.0014823 | response to activity                     | 4  | 0.00651 | ENSP00000196371,ENSP00000241052,ENSP00000252785,ENSP00000385638                                                                                                                                                                                                                                                                                                                                                                                                                                                                                                                                                                                                                                                                                                                 | CAT, HADH, OXCT1, SCO2                                                                                                                                                                                                                                                                                                                                       |
| GO.0006626 | protein targeting to mitochondrion       | 4  | 0.00734 | ENSP00000169551,ENSP00000270538,ENSP00000357360,ENSP00000361993                                                                                                                                                                                                                                                                                                                                                                                                                                                                                                                                                                                                                                                                                                                 | MTX1, TIMM21, TIMM44, TIMM8A                                                                                                                                                                                                                                                                                                                                 |
| GO.0042180 | cellular ketone metabolic process        | 4  | 0.00816 | ENSP00000196371,ENSP00000262507,ENSP00000340278,ENSP00000462972                                                                                                                                                                                                                                                                                                                                                                                                                                                                                                                                                                                                                                                                                                                 | COQ9, FDXR, OXCT1, PARK7                                                                                                                                                                                                                                                                                                                                     |
| GO.0071704 | organic substance metabolic process      | 44 | 0.00842 | ENSP00000169551,ENSP00000199706,ENSP00000219794,ENSP00000247866,ENSP00000252785,ENSP00000253099,ENSP00000254035,ENSP00000258770,ENSP00000260665,ENSP00000261733,ENSP00000263035,ENSP00000263629,ENSP00000270538,ENSP00000288050,ENSP00000290597,ENSP00000299166,ENSP00000299518,ENSP00000308334,ENSP00000308901,ENSP00000318351,ENSP00000321070,ENSP00000346103,ENSP00000346921,ENSP00000354223,ENSP00000356001,ENSP00000356218,ENSP00000357360,ENSP00000357535,ENSP00000358640,ENSP00000361993,ENSP00000364986,ENSP00000366482,ENSP00000368605,ENSP00000369176,ENSP00000373404,ENSP00000377470,ENSP00000384774,ENSP00000385638,ENSP00000387123,ENSP00000392709,ENSP00000418397,ENSP00000419879,ENSP00000424328,ENSP00000450436,ENSP00000462972                                 | ACOT9, AGMAT, AK2, ALDH2, ALDH4A1, ALDH6A1, ALDH7A1, ATP5S, BCKDHB, BCKDK, CDS2, CKMT2, CNP, CYB5R1, DHTKD1, ECHS1, FDXR, FXN, GPX4, HADH, HK1, IDH3A, IVD, LRPPRC, ME2, MPC1, MRPL18, MRPL2, MRPL28, MRPL4, MRPL45, MRPS30, MTF12, MTX1, NDUFB2, NDUFB6, NDUFB8, NDUFS1, PDPR, SCO2, TBRG4, TIMM21, TIMM44, TIMM8A                                          |
| GO.0030150 | protein import into mitochondrial matrix | 2  | 0.0165  | ENSP00000169551,ENSP00000270538                                                                                                                                                                                                                                                                                                                                                                                                                                                                                                                                                                                                                                                                                                                                                 | TIMM21, TIMM44                                                                                                                                                                                                                                                                                                                                               |
| GO.0006518 | peptide metabolic process                | 8  | 0.0168  | ENSP00000199706,ENSP00000253099,ENSP00000263629,ENSP00000308901,ENSP00000314649,ENSP00000356001,ENSP00000373404,ENSP00000424328                                                                                                                                                                                                                                                                                                                                                                                                                                                                                                                                                                                                                                                 | ALDH5A1, MRPL18, MRPL2, MRPL28, MRPL4, MRPL45, MRPS30, MTF12                                                                                                                                                                                                                                                                                                 |
| GO.0006066 | alcohol metabolic process                | 7  | 0.0227  | ENSP00000241052,ENSP00000261733,ENSP00000316924,ENSP00000340278,ENSP00000356218,ENSP00000387123,ENSP00000462972                                                                                                                                                                                                                                                                                                                                                                                                                                                                                                                                                                                                                                                                 | ACSS1, ALDH2, ALDH7A1, CAT, CYB5R1, FDXR, PARK7                                                                                                                                                                                                                                                                                                              |
| GO.0072329 | monocarboxylic acid catabolic process    | 4  | 0.0243  | ENSP00000290597,ENSP00000314649,ENSP00000357535,ENSP00000385638                                                                                                                                                                                                                                                                                                                                                                                                                                                                                                                                                                                                                                                                                                                 | ALDH4A1, ALDH5A1, ECHS1, HADH                                                                                                                                                                                                                                                                                                                                |

|            |                                              |    |        |                                                                                                                                                                                                                                                                                                                                                                                                                                                                                                 |                                                                                                                                                                                                                     |
|------------|----------------------------------------------|----|--------|-------------------------------------------------------------------------------------------------------------------------------------------------------------------------------------------------------------------------------------------------------------------------------------------------------------------------------------------------------------------------------------------------------------------------------------------------------------------------------------------------|---------------------------------------------------------------------------------------------------------------------------------------------------------------------------------------------------------------------|
| GO.0014870 | response to muscle inactivity                | 2  | 0.0321 | ENSP00000320171,ENSP00000357057                                                                                                                                                                                                                                                                                                                                                                                                                                                                 | CASQ1, PKM                                                                                                                                                                                                          |
| GO.0042182 | ketone catabolic process                     | 2  | 0.0321 | ENSP00000196371,ENSP00000340278                                                                                                                                                                                                                                                                                                                                                                                                                                                                 | OXCT1, PARK7                                                                                                                                                                                                        |
| GO.0044283 | small molecule biosynthetic process          | 7  | 0.04   | ENSP00000262507,ENSP00000290597,ENSP00000316924,ENSP00000320171,ENSP00000340278,ENSP00000356218,ENSP00000462972                                                                                                                                                                                                                                                                                                                                                                                 | ACSS1, ALDH4A1, COQ9, CYB5R1, FDXR, PARK7, PKM                                                                                                                                                                      |
| GO.0034308 | primary alcohol metabolic process            | 3  | 0.0407 | ENSP00000261733,ENSP00000316924,ENSP00000340278                                                                                                                                                                                                                                                                                                                                                                                                                                                 | ACSS1, ALDH2, PARK7                                                                                                                                                                                                 |
| GO.0034641 | cellular nitrogen compound metabolic process | 30 | 0.0421 | ENSP00000199706,ENSP00000217901,ENSP00000241052,ENSP00000247866,ENSP00000252785,ENSP00000253099,ENSP00000254035,ENSP00000260665,ENSP00000262507,ENSP00000263035,ENSP00000263629,ENSP00000290597,ENSP00000299166,ENSP00000308334,ENSP00000308901,ENSP00000318351,ENSP00000346921,ENSP00000356001,ENSP00000364986,ENSP00000366482,ENSP00000369134,ENSP00000369176,ENSP00000373404,ENSP00000377470,ENSP00000384774,ENSP00000387123,ENSP00000392709,ENSP00000418397,ENSP00000424328,ENSP00000450436 | AGMAT, AK2, ALDH4A1, ALDH6A1, ALDH7A1, ATP5S, BCKDHB, CAT, CKMT2, CNP, COQ9, DHTKD1, FXN, HK1, IDH3G, IVD, LRPPRC, MRPL18, MRPL2, MRPL28, MRPL4, MRPL45, MRPS30, MTIF2, NDUFB2, NDUFB6, NDUFB8, NDUFS1, PDHA1, SCO2 |

**Supplemental Table 8**

**Biological processes by gene ontology (GO) categories in 41 differentially expressed proteins in intermyofibrillar mitochondria from obese that met false discovery rate criteria (P<0.05). Analysis was performed using the STRING database.**

| Pathway ID | Pathway description                                    | Observed gene count | False discovery rate | Matching proteins in your network (IDs)                                                                                                                                                                                                                                                                                                                                                                                                                                                                                                        | Matching proteins in your network (labels)                                                                                                                                                                                      |
|------------|--------------------------------------------------------|---------------------|----------------------|------------------------------------------------------------------------------------------------------------------------------------------------------------------------------------------------------------------------------------------------------------------------------------------------------------------------------------------------------------------------------------------------------------------------------------------------------------------------------------------------------------------------------------------------|---------------------------------------------------------------------------------------------------------------------------------------------------------------------------------------------------------------------------------|
| GO.0044281 | small molecule metabolic process                       | 23                  | 2.69E-11             | ENSP00000247866, ENSP00000259037, ENSP00000261733, ENSP00000262030, ENSP00000281455, ENSP00000290597, ENSP00000300441, ENSP00000326305, ENSP00000335261, ENSP00000340684, ENSP00000345774, ENSP00000346173, ENSP00000347988, ENSP00000352706, ENSP00000354813, ENSP00000369176, ENSP00000379503, ENSP00000379895, ENSP00000389649, ENSP00000409612, ENSP00000419325, ENSP00000420927, ENSP00000450436                                                                                                                                          | ACADM, ACSF2, ACSL1, ALDH2, ALDH3A2, ALDH4A1, ALDH6A1, ATP5B, ATP5J, ETFB, GATM, HIBCH, MAOA, MT-ND5, NDUFA5, NDUFB2, NDUFB5, NDUFB6, PDK2, PDP1, SLC25A20, SUCLG2, TMLHE                                                       |
| GO.0044710 | single-organism metabolic process                      | 28                  | 9.71E-11             | ENSP00000247461, ENSP00000247866, ENSP00000259037, ENSP00000261733, ENSP00000262030, ENSP00000281455, ENSP00000290597, ENSP00000298510, ENSP00000300408, ENSP00000300441, ENSP000003005682, ENSP00000324173, ENSP00000326305, ENSP00000335261, ENSP00000340684, ENSP00000345774, ENSP00000346173, ENSP00000347988, ENSP00000352706, ENSP00000354580, ENSP00000354813, ENSP00000369176, ENSP00000379503, ENSP00000379895, ENSP00000389649, ENSP00000409612, ENSP00000419325, ENSP00000420927, ENSP00000450436                                   | ACADM, ACSF2, ACSL1, ALDH2, ALDH3A2, ALDH4A1, ALDH6A1, ATP5J, CANX, ETFB, GATM, HIBCH, HSPAS, MAOA, MRPL21, MRPL39, MT-ND5, NDUFA5, NDUFB2, NDUFB5, NDUFB6, PDK2, PDP1, PHB, PRDX3, SLC25A20, SUCLG2, TMLHE                     |
| GO.0055114 | oxidation-reduction process                            | 17                  | 1.82E-10             | ENSP00000247866, ENSP00000259037, ENSP00000261733, ENSP00000262030, ENSP00000290597, ENSP00000298510, ENSP00000335261, ENSP00000340684, ENSP00000345774, ENSP00000346173, ENSP00000347988, ENSP00000354813, ENSP00000369176, ENSP00000389649, ENSP00000409612, ENSP00000419325, ENSP00000450436                                                                                                                                                                                                                                                | ACADM, ALDH2, ALDH3A2, ALDH4A1, ALDH6A1, ATP5B, ATP5J, ETFB, MAOA, MT-ND5, NDUFA5, NDUFB2, NDUFB5, NDUFB6, PRDX3, SUCLG2, TMLHE                                                                                                 |
| GO.0045333 | cellular respiration                                   | 9                   | 3.88E-08             | ENSP00000247866, ENSP00000259037, ENSP00000262030, ENSP00000346173, ENSP00000347988, ENSP00000354813, ENSP00000369176, ENSP00000389649, ENSP00000409612, ENSP00000419325, ENSP00000420927, ENSP00000450436                                                                                                                                                                                                                                                                                                                                     | ATP5B, ATP5J, ETFB, MT-ND5, NDUFA5, NDUFB2, NDUFB5, NDUFB6, SUCLG2                                                                                                                                                              |
| GO.0022904 | respiratory electron transport chain                   | 8                   | 9.34E-08             | ENSP00000247866, ENSP00000259037, ENSP00000262030, ENSP00000346173, ENSP00000347988, ENSP00000354813, ENSP00000369176, ENSP00000389649, ENSP00000409612, ENSP00000419325, ENSP00000420927, ENSP00000450436                                                                                                                                                                                                                                                                                                                                     | ATP5B, ATP5J, ETFB, MT-ND5, NDUFA5, NDUFB2, NDUFB5, NDUFB6                                                                                                                                                                      |
| GO.0046034 | ATP metabolic process                                  | 7                   | 1.87E-05             | ENSP00000247866, ENSP00000259037, ENSP00000262030, ENSP00000347988, ENSP00000354813, ENSP00000369176, ENSP00000389649, ENSP00000409612, ENSP00000419325, ENSP00000420927, ENSP00000450436                                                                                                                                                                                                                                                                                                                                                      | ATP5B, ATP5J, MT-ND5, NDUFA5, NDUFB2, NDUFB5, NDUFB6                                                                                                                                                                            |
| GO.0006120 | mitochondrial electron transport, NADH to ubiquinone   | 5                   | 2.27E-05             | ENSP00000247866, ENSP00000259037, ENSP00000347988, ENSP00000354813, ENSP00000369176, ENSP00000389649, ENSP00000409612, ENSP00000419325, ENSP00000420927, ENSP00000450436                                                                                                                                                                                                                                                                                                                                                                       | MT-ND5, NDUFA5, NDUFB2, NDUFB5, NDUFB6                                                                                                                                                                                          |
| GO.0071704 | organic substance metabolic process                    | 30                  | 2.32E-05             | ENSP00000226299, ENSP00000246957, ENSP00000247866, ENSP00000259037, ENSP00000261733, ENSP00000281455, ENSP00000290597, ENSP00000298510, ENSP00000300441, ENSP000003005682, ENSP00000324173, ENSP00000326305, ENSP00000335261, ENSP00000340684, ENSP00000345774, ENSP00000346173, ENSP00000347988, ENSP00000352706, ENSP00000354580, ENSP00000354813, ENSP00000368605, ENSP00000369176, ENSP00000370377, ENSP00000379503, ENSP00000389649, ENSP00000389649, ENSP00000409612, ENSP00000419325, ENSP00000420927, ENSP00000438465, ENSP00000450436 | ACADM, ACOT9, ACSF2, ACSL1, ALDH2, ALDH3A2, ALDH4A1, ALDH6A1, ATP5J, GATM, HIBCH, HSPAS, LAP3, MRPL21, MRPL39, MT-ND5, NDUFA5, NDUFB2, NDUFB5, NDUFB6, PDK2, PDP1, PGAM5, PITRM1, PRDX3, SLC25A20, SUCLG2, TIMM50, TMLHE, TRAP1 |
| GO.0019752 | carboxylic acid metabolic process                      | 11                  | 2.60E-05             | ENSP00000281455, ENSP00000290597, ENSP00000300441, ENSP00000335261, ENSP00000352706, ENSP00000379503, ENSP00000379895, ENSP00000409612, ENSP00000419325, ENSP00000420927, ENSP00000450436                                                                                                                                                                                                                                                                                                                                                      | ACADM, ACSF2, ACSL1, ALDH4A1, ALDH6A1, GATM, HIBCH, PDK2, PDP1, SUCLG2, TMLHE                                                                                                                                                   |
| GO.0044237 | cellular metabolic process                             | 29                  | 3.70E-05             | ENSP00000246957, ENSP00000247866, ENSP00000259037, ENSP00000261733, ENSP00000262030, ENSP00000290597, ENSP00000298510, ENSP00000300441, ENSP000003005682, ENSP00000318115, ENSP00000324173, ENSP00000326305, ENSP00000335261, ENSP00000345774, ENSP00000346173, ENSP00000347988, ENSP00000352706, ENSP00000354580, ENSP00000354813, ENSP00000368605, ENSP00000369176, ENSP00000379503, ENSP00000379895, ENSP00000389649, ENSP00000409612, ENSP00000419325, ENSP00000420927, ENSP00000438465, ENSP00000450436                                   | ACADM, ACOT9, ACSF2, ALDH2, ALDH3A2, ALDH4A1, ALDH6A1, ATP5B, ATP5J, ETFB, GATM, HIBCH, HSPAS, MRPL21, MRPL39, MT-ND5, NDUFA5, NDUFB2, NDUFB5, NDUFB6, PDK2, PDP1, PGAM5, PRDX3, SLC25A20, SUCLG2, TIMM50, TMLHE, TRAP1         |
| GO.0042775 | mitochondrial ATP synthesis coupled electron transport | 5                   | 4.20E-05             | ENSP00000247866, ENSP00000259037, ENSP00000347988, ENSP00000354813, ENSP00000369176, ENSP00000389649, ENSP00000409612, ENSP00000419325, ENSP00000420927, ENSP00000450436                                                                                                                                                                                                                                                                                                                                                                       | MT-ND5, NDUFA5, NDUFB2, NDUFB5, NDUFB6                                                                                                                                                                                          |
| GO.0006119 | oxidative phosphorylation                              | 5                   | 6.99E-05             | ENSP00000247866, ENSP00000259037, ENSP00000347988, ENSP00000354813, ENSP00000369176, ENSP00000389649, ENSP00000409612, ENSP00000419325, ENSP00000420927, ENSP00000450436                                                                                                                                                                                                                                                                                                                                                                       | MT-ND5, NDUFA5, NDUFB2, NDUFB5, NDUFB6                                                                                                                                                                                          |
| GO.0006793 | phosphorus metabolic process                           | 14                  | 1.86E-04             | ENSP00000247866, ENSP00000259037, ENSP00000262030, ENSP00000281455, ENSP00000318115, ENSP00000347988, ENSP00000354813, ENSP00000368605, ENSP00000369176, ENSP00000379503, ENSP00000389649, ENSP00000409612, ENSP00000419325, ENSP00000420927, ENSP00000438465                                                                                                                                                                                                                                                                                  | ACOT9, ACSL1, ATP5B, ATP5J, MT-ND5, NDUFA5, NDUFB2, NDUFB5, NDUFB6, PDK2, PDP1, PGAM5, SUCLG2, TIMM50                                                                                                                           |
| GO.0044238 | primary metabolic process                              | 28                  | 2.37E-04             | ENSP00000226299, ENSP00000246957, ENSP00000247866, ENSP00000259037, ENSP00000261733, ENSP00000281455, ENSP00000290597, ENSP00000298510, ENSP00000300441, ENSP000003005682, ENSP00000324173, ENSP00000326305, ENSP00000335261, ENSP00000340684, ENSP00000345774, ENSP00000346173, ENSP00000347988, ENSP00000352706, ENSP00000354580, ENSP00000354813, ENSP00000368605, ENSP00000369176, ENSP00000370377, ENSP00000379503, ENSP00000379895, ENSP00000389649, ENSP00000409612, ENSP00000419325, ENSP00000420927, ENSP00000438465, ENSP00000450436 | ACADM, ACSF2, ACSL1, ALDH2, ALDH3A2, ALDH4A1, ALDH6A1, ATP5J, GATM, HIBCH, HSPAS, LAP3, MRPL21, MRPL39, MT-ND5, NDUFA5, NDUFB2, NDUFB5, NDUFB6, PDK2, PDP1, PGAM5, PITRM1, PRDX3, SLC25A20, SUCLG2, TIMM50, TMLHE, TRAP1        |
| GO.1901564 | organonitrogen compound metabolic process              | 13                  | 2.51E-04             | ENSP00000247866, ENSP00000259037, ENSP00000262030, ENSP00000290597, ENSP000003005682, ENSP00000347988, ENSP00000352706, ENSP00000354580, ENSP00000354813, ENSP00000369176, ENSP00000379895, ENSP00000389649, ENSP00000409612, ENSP00000419325, ENSP00000420927, ENSP00000438465, ENSP00000450436                                                                                                                                                                                                                                               | ALDH4A1, ALDH6A1, ATP5B, ATP5J, GATM, HIBCH, MRPL21, MRPL39, MT-ND5, NDUFA5, NDUFB2, NDUFB5, NDUFB6                                                                                                                             |
| GO.0008152 | metabolic process                                      | 29                  | 4.70E-04             | ENSP00000226299, ENSP00000246957, ENSP00000247866, ENSP00000259037, ENSP00000261733, ENSP00000281455, ENSP00000290597, ENSP00000298510, ENSP00000300441, ENSP000003005682, ENSP00000318115, ENSP00000324173, ENSP00000326305, ENSP00000335261, ENSP00000345774, ENSP00000346173, ENSP00000347988, ENSP00000352706, ENSP00000354580, ENSP00000354813, ENSP00000368605, ENSP00000369176, ENSP00000370377, ENSP00000379503, ENSP00000389649, ENSP00000389649, ENSP00000409612, ENSP00000419325, ENSP00000420927, ENSP00000438465, ENSP00000450436 | ACADM, ACOT9, ACSF2, ALDH2, ALDH3A2, ALDH4A1, ALDH6A1, ATP5J, ETFB, HIBCH, HSPAS, LAP3, MRPL21, MRPL39, MT-ND5, NDUFA5, NDUFB2, NDUFB5, NDUFB6, PDK2, PDP1, PGAM5, PITRM1, PRDX3, SLC25A20, SUCLG2, TIMM50, TMLHE, TRAP1        |

|            |                                                             |    |          |                                                                                                                                                                                                                                                                                                                                                                                                                                                                 |                                                                                                                                                                                                              |
|------------|-------------------------------------------------------------|----|----------|-----------------------------------------------------------------------------------------------------------------------------------------------------------------------------------------------------------------------------------------------------------------------------------------------------------------------------------------------------------------------------------------------------------------------------------------------------------------|--------------------------------------------------------------------------------------------------------------------------------------------------------------------------------------------------------------|
| GO.0055086 | nucleobase-containing small molecule metabolic process      | 8  | 4.70E-04 | ENSP00000247866,ENSP00000259037,ENSP00000262030,ENSP00000347988,ENSP00000354813,ENSP00000369176,ENSP00000389649,ENSP00000450436                                                                                                                                                                                                                                                                                                                                 | ALDH6A1, ATP5B, ATP5J, MT-ND5, NDUFA5, NDUFB2, NDUFB5, NDUFB6                                                                                                                                                |
| GO.0032787 | monocarboxylic acid metabolic process                       | 7  | 3.28E-03 | ENSP00000281455,ENSP00000290597,ENSP00000300441,ENSP00000335261,ENSP00000379503,ENSP00000409612,ENSP00000420927                                                                                                                                                                                                                                                                                                                                                 | ACADM, ACSF2, ACSL1, ALDH4A1, PDK2, PDP1, TMLHE                                                                                                                                                              |
| GO.0006574 | valine catabolic process                                    | 2  | 5.52E-03 | ENSP00000352706,ENSP00000450436                                                                                                                                                                                                                                                                                                                                                                                                                                 | ALDH6A1, HIBCH                                                                                                                                                                                               |
| GO.0044763 | single-organism cellular process                            | 28 | 6.98E-03 | ENSP00000247461,ENSP00000247866,ENSP00000259037,ENSP00000261733,ENSP00000290597,ENSP00000298510,ENSP00000300408,ENSP00000300441,ENSP00000305682,ENSP00000318115,ENSP00000324173,ENSP00000326305,ENSP00000335261,ENSP00000340684,ENSP00000345774,ENSP00000346173,ENSP00000347988,ENSP00000352706,ENSP00000354580,ENSP00000354813,ENSP00000369176,ENSP00000379503,ENSP00000379895,ENSP00000409612,ENSP00000419325,ENSP00000420927,ENSP00000438465,ENSP00000450436 | ACADM, ACSF2, ALDH2, ALDH3A2, ALDH4A1, ALDH6A1, CANX, ETFB, GATM, HIBCH, HSPA5, MAOA, MRPL21, MRPL39, MT-ND5, NDUFA5, NDUFB2, NDUFB5, NDUFB6, PDK2, PDP1, PGAM5, PHB, PRDX3, SLC25A20, SUCLG2, TIMM50, TMLHE |
| GO.0045329 | carnitine biosynthetic process                              | 2  | 8.81E-03 | ENSP00000335261,ENSP00000409612                                                                                                                                                                                                                                                                                                                                                                                                                                 | ACADM, TMLHE                                                                                                                                                                                                 |
| GO.0007005 | mitochondrion organization                                  | 6  | 1.46E-02 | ENSP00000262030,ENSP00000298510,ENSP00000300408,ENSP00000305682,ENSP00000318115,ENSP00000354580                                                                                                                                                                                                                                                                                                                                                                 | ATP5B, MRPL21, MRPL39, PHB, PRDX3, TIMM50                                                                                                                                                                    |
| GO.0044282 | small molecule catabolic process                            | 5  | 1.68E-02 | ENSP00000261733,ENSP00000290597,ENSP00000352706,ENSP00000409612,ENSP00000450436                                                                                                                                                                                                                                                                                                                                                                                 | ACADM, ALDH2, ALDH4A1, ALDH6A1, HIBCH                                                                                                                                                                        |
| GO.0006796 | phosphate-containing compound metabolic process             | 11 | 2.04E-02 | ENSP00000247866,ENSP00000259037,ENSP00000262030,ENSP00000318115,ENSP00000347988,ENSP00000354813,ENSP00000369176,ENSP00000379503,ENSP00000389649,ENSP00000420927,ENSP00000438465                                                                                                                                                                                                                                                                                 | ATP5B, ATP5J, MT-ND5, NDUFA5, NDUFB2, NDUFB5, NDUFB6, PDK2, PDP1, PGAM5, TIMM50                                                                                                                              |
| GO.1990542 | mitochondrial transmembrane transport                       | 3  | 2.04E-02 | ENSP00000262030,ENSP00000326305,ENSP00000389649                                                                                                                                                                                                                                                                                                                                                                                                                 | ATP5B, ATP5J, SLC25A20                                                                                                                                                                                       |
| GO.0034975 | protein folding in endoplasmic reticulum                    | 2  | 2.14E-02 | ENSP00000247461,ENSP00000324173                                                                                                                                                                                                                                                                                                                                                                                                                                 | CANX, HSPA5                                                                                                                                                                                                  |
| GO.0006839 | mitochondrial transport                                     | 4  | 3.33E-02 | ENSP00000262030,ENSP00000318115,ENSP00000326305,ENSP00000389649                                                                                                                                                                                                                                                                                                                                                                                                 | ATP5B, ATP5J, SLC25A20, TIMM50                                                                                                                                                                               |
| GO.0006637 | acyl-CoA metabolic process                                  | 3  | 4.19E-02 | ENSP00000281455,ENSP00000368605,ENSP00000419325                                                                                                                                                                                                                                                                                                                                                                                                                 | ACOT9, ACSL1, SUCLG2                                                                                                                                                                                         |
| GO.1901135 | carbohydrate derivative metabolic process                   | 8  | 4.19E-02 | ENSP00000247461,ENSP00000247866,ENSP00000259037,ENSP00000262030,ENSP00000347988,ENSP00000354813,ENSP00000369176,ENSP00000389649                                                                                                                                                                                                                                                                                                                                 | ATP5B, ATP5J, CANX, MT-ND5, NDUFA5, NDUFB2, NDUFB5, NDUFB6                                                                                                                                                   |
| GO.0044711 | single-organism biosynthetic process                        | 9  | 4.31E-02 | ENSP00000262030,ENSP00000281455,ENSP00000290597,ENSP00000305682,ENSP00000335261,ENSP00000354580,ENSP00000379895,ENSP00000389649,ENSP00000409612                                                                                                                                                                                                                                                                                                                 | ACADM, ACSL1, ALDH4A1, ATP5B, ATP5J, GATM, MRPL21, MRPL39, TMLHE                                                                                                                                             |
| GO.0010510 | regulation of acetyl-CoA biosynthetic process from pyruvate | 2  | 4.44E-02 | ENSP00000379503,ENSP00000420927                                                                                                                                                                                                                                                                                                                                                                                                                                 | PDK2, PDP1                                                                                                                                                                                                   |

**Supplemental Table 9**

**Mapped pathways associated with subsarcolemmal-to-intermyofibrillar mitochondrial protein abundance ratios of 290 mitochondrial identified in both mitochondrial fractions and in both the subjects with obesity and the lean controls that met false discovery rate (FDR) criteria ( $P \leq 0.05$ ). Analysis was performed using the Reactome Software.**

| Pathway Identifier | Pathway name                                                                                                        | #Entities found | Entities pValue | Entities FDR | Mapped entities          |
|--------------------|---------------------------------------------------------------------------------------------------------------------|-----------------|-----------------|--------------|--------------------------|
| R-HSA-611105       | Respiratory electron transport                                                                                      | 3               | 7.56E-06        | 8.37E-05     | NDUB6;CY1;NUSM           |
| R-HSA-163200       | Respiratory electron transport, ATP synthesis by chemiosmotic coupling, and heat production by uncoupling proteins. | 3               | 1.40E-05        | 8.37E-05     | NDUB6;CY1;NUSM           |
| R-HSA-1428517      | The citric acid (TCA) cycle and respiratory electron transport                                                      | 3               | 3.51E-05        | 1.40E-04     | NDUB6;CY1;NUSM           |
| R-HSA-6799198      | Complex I biogenesis                                                                                                | 2               | 2.46E-04        | 5.11E-04     | NDUB6;NUSM               |
| R-HSA-1430728      | Metabolism                                                                                                          | 5               | 2.56E-04        | 5.11E-04     | NDUB6;KAD2;CY1;KCRS;NUSM |
| R-HSA-71288        | Creatine metabolism                                                                                                 | 1               | 4.52E-03        | 9.05E-03     | KCRS                     |
| R-HSA-499943       | Interconversion of nucleotide di- and triphosphates                                                                 | 1               | 1.44E-02        | 1.44E-02     | KAD2                     |
| R-HSA-1268020      | Mitochondrial protein import                                                                                        | 1               | 2.91E-02        | 2.91E-02     | CY1                      |
| R-HSA-351202       | Metabolism of polyamines                                                                                            | 1               | 3.79E-02        | 3.79E-02     | KCRS                     |
| R-HSA-15869        | Metabolism of nucleotides                                                                                           | 1               | 4.67E-02        | 4.67E-02     | KAD2                     |
